Chen et al.

1

2

3

4

5

6

7 **Cell autonomous versus systemic Akt isoform deletions uncovered new roles for**  
8 **Akt1 and Akt2 in breast cancer**

9

10

11 Xinyu Chen<sup>1</sup>, Majd M. Ariss<sup>1#</sup>, Gopalkrishnan Ramakrishnan<sup>1#</sup>, Veronique Nogueira<sup>1#</sup>,  
12 Catherine Blaha<sup>1</sup>, William Putzbach<sup>1</sup>, Abul B. M. M. K. Islam<sup>3</sup>, Maxim V. Frolov<sup>1</sup>, and  
13 Nissim Hay<sup>1,2\*</sup>

14

15 <sup>1</sup>Department of Biochemistry and Molecular Genetics, College of Medicine, University of  
16 Illinois at Chicago, Chicago, IL 60607, USA <sup>2</sup>Research & Development Section, Jesse  
17 Brown VA Medical Center, Chicago, IL 60612, USA <sup>3</sup>Department of Genetic Engineering  
18 and Biotechnology, University of Dhaka, Dhaka 1000, Bangladesh.

19

20 \* Correspondence: [nhay@uic.edu](mailto:nhay@uic.edu)

21 # Equal contribution

22

23

24

25

Chen et al.

26 **Abstract**

27

28 Studies in three mouse models of breast cancer identified profound discrepancies  
29 between cell autonomous and systemic Akt1 or Akt2 deletion on breast cancer  
30 tumorigenesis and metastasis. First, unlike systemic Akt1 deletion, which inhibits  
31 metastasis, cell autonomous Akt1 deletion does not. Second, systemic Akt2 deletion  
32 does not inhibit mammary tumorigenesis and metastasis, but cell autonomous Akt2  
33 deletion eliminates ErbB2 expressing cells in the mammary gland and prevents  
34 tumorigenesis. However, the elevation in insulin by Akt2 systemic deletion  
35 hyperactivates tumor Akt, enabling ErbB2 expression, and exacerbates mammary  
36 tumorigenesis. Decreasing insulin level inhibits accelerated tumorigenesis by systemic  
37 Akt2 deletion. Single cell mRNA sequencing revealed that systemic Akt1 deletion  
38 maintains the pro-metastatic cluster within primary tumors but ablates pro-metastatic  
39 neutrophils. Systemic Akt1 deletion inhibits metastasis by impairing the survival and  
40 mobilization of tumor-associated neutrophils. Importantly, neutrophil-specific deletion of  
41 Akt1 is sufficient to exert resistance to metastasis. The results underscore the  
42 importance of determining systemic effects rather than cell autonomous effects as a  
43 proof of concept for cancer therapy.

44

Chen et al.

45  
46 The serine/threonine kinase Akt is frequently hyperactivated in breast cancer through  
47 multiple mechanisms, including PI3K activation, PTEN loss, and ErbB2/Her2/neu  
48 activation/amplification <sup>1</sup>. However, previous studies regarding the roles of Akt isoforms  
49 in breast cancer did not provide a coherent understanding, and the results are  
50 controversial. The ablation of Akt1 in cell culture increased the migration and epithelial  
51 mesenchymal transition (EMT), whereas ablation of Akt2 decreased EMT <sup>2</sup>. In a mouse  
52 model of breast cancer, the activation of Akt1 increased tumor development but  
53 decreased metastasis, whereas the activation of Akt2 did not increase tumor  
54 development but increased metastasis <sup>3,4</sup>. Finally, in mouse models of breast cancer, the  
55 germ line deletion of Akt1 inhibits both tumor development and metastasis <sup>5,6</sup>, whereas  
56 the germ line deletion of Akt2 enhances both tumor development and metastasis <sup>5</sup>.  
57 However, these studies do not distinguish between the cell autonomous and non-cell  
58 autonomous effects of Akt isoforms on breast cancer and do not emulate drug therapy.  
59 Therefore, we launched a comprehensive approach to examine the roles of Akt1 and  
60 Akt2 in mammary gland tumor initiation, progression and metastasis, and to understand  
61 their therapeutic implications. We employed three mouse models of breast cancer; two  
62 Her2 enriched models and one luminal B model, to distinguish between cell autonomous  
63 and systemic effects after tumor onset (Fig. S1).

64

65 **The effects of Akt1 versus Akt2 cell autonomous deletion on primary tumors and**  
66 **metastasis driven by ErbB2.**

67 In the cell autonomous mouse model (*MMTV-Neu-IRES-Cre (NIC)*), where ErbB2 and  
68 Cre recombinase are concomitantly expressed (Fig. 1a), we found that the cell  
69 autonomous deletion of Akt1 impaired tumor development and increased tumor-free  
70 survival (Fig. 1b), which is consistent with the effects of the germline deletion of Akt1 <sup>5,6</sup>.  
71 Surprisingly, the cell autonomous deletion of Akt2 completely inhibited tumor  
72 development (Fig. 1b). The heterozygous deletion of Akt2 did not inhibit tumor  
73 development (Fig. 1b), indicating that the complete inhibition of tumor development by  
74 Akt2 deletion in the mammary gland is not due to transgene (ErbB2) silencing. This  
75 finding is in stark contrast to effects of the germ line or systemic deletion of Akt2, which  
76 did not inhibit tumor development, but rather exacerbated tumor development <sup>5</sup> (Fig. 2).  
77 Immunoblot analysis showed that Akt1 was deleted in ErbB2-expressing mammary  
78 glands of *MMTV-NIC;Akt1<sup>fl/fl</sup>* mice, but no expression of ErbB2 or deletion of Akt2 was

Chen et al.

79 found in the mammary glands of *MMTV-NIC;Akt2<sup>ff</sup>* mice (Fig. 1c). Taken together, these  
80 results suggest that ErbB2 expression cannot be tolerated in the absence of Akt2 and  
81 that cells expressing ErbB2 in the absence of Akt2 are eliminated. The results also  
82 suggest that the germ line<sup>5</sup> or systemic deletion of Akt2 (Fig. 2) enables ErbB2/*Akt2<sup>-/-</sup>*  
83 mammary gland tumor cells to proliferate and overcome the intolerance to ErbB2  
84 expression in the absence of Akt2. To further verify these possibilities, we generated  
85 *MMTV-NIC;R26Luc<sup>LSL</sup>* and *MMTV-NIC;Akt2<sup>ff</sup>;R26Luc<sup>LSL</sup>* mice, in which the luciferase  
86 (Luc) gene was inserted in the ubiquitously expressed Rosa26 (R26) locus and is  
87 expressed only if Cre recombinase is also expressed<sup>7</sup> (Fig. 1d). If Cre recombinase is  
88 expressed and the cells survive, luciferase will be expressed and detected in the mice by  
89 luminescence imaging. Our results showed luciferase expression only in the *MMTV-*  
90 *NIC;R26Luc<sup>LSL</sup>*, *MMTV-NIC;Akt1<sup>ff</sup>;R26Luc<sup>LSL</sup>*, and *MMTV-NIC;Akt2<sup>+/ff</sup>;R26Luc<sup>LSL</sup>* mice  
91 but not in the *MMTV-NIC;Akt2<sup>ff</sup>;R26Luc<sup>LSL</sup>* mice (Fig. 1d). These results further  
92 established the notion that the expression of ErbB2 in the absence of Akt2 is not  
93 tolerated in mammary gland cells; thus, these cells are eliminated. It remains to be  
94 explained, however, why ErbB2 expression in the absence of Akt1 can be tolerated. One  
95 potential explanation is that ErbB2 expression cannot be tolerated when total Akt activity  
96 is reduced below a certain threshold level. Akt2 is expressed at the highest level and  
97 Akt1 is expressed at the lowest level at early stages of tumor development (Fig. 1e).  
98 Therefore, it is possible that the deletion of Akt2 reduces total Akt activity more than the  
99 deletion of Akt1 at early stages of tumor development. Further support for this assertion  
100 is shown and discussed below (Fig. 2h, 2i, and supp. Fig. 3c).

101 To analyze metastasis, the primary tumors were allowed to grow to endpoint, and  
102 subsequently the incidence of metastasis was determined. Thus, the incidence of  
103 metastasis is not a consequence of primary tumor growth. Interestingly, despite  
104 attenuating tumor development, the cell autonomous deletion of Akt1, unlike the germ  
105 line deletion of Akt1<sup>5,6</sup>, did not inhibit the incidence of metastasis to the lung of tumor  
106 bearing mice (Fig. 1f).

107

### 108 **Consequences of the systemic deletion of Akt1 or Akt2 after tumor onset in** 109 ***MMTV-ErbB2* mice.**

110 The cell autonomous deletion of Akt1, unlike the Akt1 germ line deletion, did not  
111 affect tumor metastasis, raising the possibility that the effect of Akt1 on metastasis is  
112 systemic. To assess the effect of the systemic deletion of different Akt isoforms after

Chen et al.

113 tumor formation and to emulate single isoform inhibitor drug therapy, we used *MMTV-*  
114 *ErbB2* mice<sup>8</sup>, in which *ErbB2* is overexpressed in the epithelial cells of the mammary  
115 gland. We bred *MMTV-ErbB2* mice with either *Akt1<sup>ff</sup>;Rosa26(R26)Cre<sup>ERT2</sup>* mice or  
116 *Akt2<sup>ff</sup>;R26Cre<sup>ERT2</sup>* mice to generate *MMTV-ErbB2;Akt1<sup>ff</sup>;R26Cre<sup>ERT2</sup>* and *MMTV-*  
117 *ErbB2;Akt2<sup>ff</sup>;R26Cre<sup>ERT2</sup>* mice (Fig. 2a). As we have shown previously, the use of  
118 *R26Cre<sup>ERT2</sup>* mice, in which *CreERT2* was inserted in the ubiquitously expressed  
119 *ROSA26* locus, enables the systemic deletion of *Akt* isoforms in adult mice after the  
120 injection of tamoxifen<sup>9</sup>. After a latency period of 40-50 weeks, the mice developed  
121 palpable mammary tumors (approx. 0.1 cm<sup>3</sup>). We then performed the intraperitoneal (IP)  
122 injection of tamoxifen for 5 consecutive days to induce *Akt1* or *Akt2* deletion (Fig. 2a).  
123 We continuously monitored tumor growth and sacrificed the mice when the humane  
124 endpoint criteria were reached. The systemic *Akt1* deletion markedly attenuated primary  
125 tumor growth (Fig. 2b, c) and extended survival (Fig. 2d). Importantly, unlike the cell  
126 autonomous *Akt1* deletion in mammary gland epithelial cells, which had no effect on  
127 tumor metastasis, the systemic *Akt1* deletion completely inhibited metastasis (Fig. 2e).  
128 Taken together, the results strongly suggest that the inhibition of metastasis by the  
129 systemic deletion of *Akt1* is not cell autonomous.

130 In contrast to the cell autonomous deletion of *Akt2* and the systemic deletion of  
131 *Akt1*, the systemic deletion of *Akt2* did not inhibit tumor growth (Fig. 2b, c), but rather  
132 increased tumor growth (Fig. 2b, c), decreased survival (Fig. 2d), and markedly  
133 increased the incidence of metastasis induced by *ErbB2* (Fig. 2e). We speculated that  
134 the high level of circulating insulin induced by the systemic deletion of *Akt2* (Fig. 2f)  
135 hyperactivates the other *Akt* isoforms and thus curbs the ability of the *Akt2* deletion to  
136 inhibit metastasis. Consistently, we found that the systemic deletion of *Akt2* markedly  
137 elevated *Akt1* phosphorylation and total *Akt* activity, as measured by the phosphorylation  
138 of its substrates *GSK3b* and *PRAS40*. (Fig. 2g and Supplementary Fig. 2a). Thus, the  
139 systemic deletion of *Akt2* blunts the cell autonomous anti-tumorigenic activity of *Akt2*  
140 (Fig. 1a) and is even pro-tumorigenic. To confirm this assertion, we crossed *MMTV-*  
141 *NIC;Akt2<sup>ff</sup>* mice, which are resistant to tumorigenesis, with *Akt2<sup>ff</sup>;R26Cre<sup>ERT2</sup>* mice to  
142 generate *MMTV-NIC;Akt2<sup>ff</sup>;R26Cre<sup>ERT2</sup>* mice. *Akt2* was systemically deleted in these  
143 animals at one month of age, which is more than 20 weeks before tumors were detected  
144 in *MMTV-NIC* mice (Fig. 1a). The systemic deletion of *Akt2* abrogated the resistance to  
145 tumorigenesis exerted by the cell autonomous deletion of *Akt2* (Fig. 2h). Importantly, the  
146 systemic deletion of *Akt2* elevated *Akt1* and possibly *Akt3* activities and enabled the

Chen et al.

147 expression of ErbB2 in the absence of Akt2 in the mammary glands of *MMTV-*  
148 *NIC;Akt2<sup>ff</sup>;R26Cre<sup>ERT2</sup>* mice (Fig. 2i, and supp. Fig. 2b), which is not expressed after cell  
149 autonomous deletion of Akt2 (Fig. 1c). These results provide strong additional support  
150 for our assertion that ErbB2 expression in the mammary gland is not tolerated when Akt  
151 activity is below a certain threshold level.

152 To determine the cell autonomous effect of Akt1 and Akt2 after tumor formation,  
153 the tumor cells derived from late stage tumors in *MMTV-ErbB2;Akt1<sup>ff</sup>;Cre<sup>ERT2</sup>* or *MMTV-*  
154 *ErbB2;Akt2<sup>ff</sup>;R26Cre<sup>ERT2</sup>* mice were orthotopically transplanted into nonobese diabetic  
155 (NOD)/Shi-scidIL-2Ry<sup>null</sup> (NOG) mice. When the tumors were palpable, the mice were  
156 exposed to tamoxifen for 5 consecutive days to delete Akt1 or Akt2. The deletion of Akt1  
157 markedly attenuated tumor growth (Supp. Fig. 3a), whereas the deletion of Akt2  
158 attenuated tumor growth to a much lesser extent (Supp. Fig. 3b). The relative effect of  
159 Akt1 versus Akt2 on tumor growth is directly correlated with their relative individual  
160 expression in late stage tumors in which Akt1 expression is induced and Akt2 expression  
161 declines (Fig. 1e). Indeed, when compared to the Akt2 deletion, the deletion of Akt1 in  
162 *MMTV-ErbB2* orthotopic tumors markedly decreased the total level of Akt, indicating that  
163 Akt1 is the predominant isoform at late stages of tumor development (Supp. Fig. 3c).

164

165 **Consequences of the systemic deletion of Akt1 or Akt2 after tumor onset in**  
166 ***MMTV-PyMT* mice.**

167 Polyoma virus middle T-antigen expression in the mammary gland of mouse mammary  
168 tumor virus-polyoma middle tumor antigen (*MMTV-PyMT*) mice induces several  
169 signaling pathways that are altered in human breast cancer, including the SRC and PI3K  
170 pathways. Specifically, the *MMTV-PyMT* mouse model will result in the development of  
171 multifocal mammary adenocarcinomas with a high incidence of metastatic lesions to the  
172 lymph nodes and lungs<sup>10</sup>. Therefore, we employed this mouse model to study the effect  
173 of systemic Akt1 or Akt2 deletion on the incidence of metastasis. We generated *MMTV-*  
174 *PyMT;R26Cre<sup>ERT2</sup>*, *MMTV-PyMT; Akt1<sup>ff</sup>;R26Cre<sup>ERT2</sup>* and *MMTV-PyMT;Akt2<sup>ff</sup>;R26Cre<sup>ERT2</sup>*  
175 mice. After tumor onset, the systemic deletion of Akt1 or Akt2 was induced by tamoxifen  
176 injection. These mice were followed and subsequently sacrificed at the endpoint to  
177 assess metastasis (Fig. 3a). The Akt1 systemic deletion significantly increased tumor  
178 free survival, whereas the Akt2 systemic deletion did not (Fig. 3b). The systemic Akt1  
179 deletion markedly reduced the number of metastatic nodules in the lungs but the  
180 systemic Akt2 deletion did not (Fig. 3c). To further establish that the effect of Akt1 on

Chen et al.

181 metastasis is not cell autonomous, we orthotopically implanted cells derived from tumors  
182 in *MMTV-PyMT; Akt1<sup>fl/fl</sup>; R26Cre<sup>ERT2</sup>* and *MMTV-PyMT; Akt2<sup>fl/fl</sup>; R26Cre<sup>ERT2</sup>* mice into NOG  
183 mice. After the tumors became palpable, the mice were treated with tamoxifen for 5  
184 consecutive days. When tumors reached the endpoint, the mice were analyzed for  
185 metastases in the lungs. As shown in Fig. 3d and 3e, the cell autonomous deletion of  
186 neither Akt1 nor Akt2 changed the number of metastatic nodules, further supporting the  
187 systemic effect of Akt1 on metastasis. These results are consistent with the results  
188 obtained in *MMTV-ErbB2* mice and further confirmed the discrepancy between the cell  
189 autonomous and systemic effects of Akt isoforms on mammary gland tumorigenesis.  
190 Indeed, similar to the results found in *MMTV-ErbB2; Akt2<sup>fl/fl</sup>; R26Cre<sup>ERT2</sup>* mice, the  
191 systemic deletion of Akt2 in *MMTV-PyMT; Akt2<sup>fl/fl</sup>; R26Cre<sup>ERT2</sup>* mice hyperactivated Akt1  
192 and total Akt activity in the tumors (Fig. 3f). The discrepancy between the inducible cell  
193 autonomous and non-cell autonomous effects of Akt1 and Akt2 deletions on tumor  
194 growth and metastasis again suggested that the inhibition of Akt1 might be superior to  
195 the inhibition of Pan-PI3K or Pan-Akt as a tumor therapy.

196

### 197 **Systemic Akt1 deletion inhibits metastasis by impairing neutrophil mobilization.**

198 To further delineate the systemic effects of Akt1 and Akt2 on mammary gland  
199 tumorigenesis and metastasis, we adopted Drop-seq technology for single cell RNA  
200 sequencing (scRNA-seq) as previously described<sup>11</sup>. Using this approach, we sequenced  
201 7,791 cells over 5 biological replicates from the primary tumors of *MMTV-PyMT* mice  
202 and identified 17 clusters (Fig. 4a, Supplementary Fig. 5a, Supplementary Table 1).  
203 Surprisingly, we identified nine distinct clusters of cells within the primary tumors based  
204 on the expression of *PyMT* (Supplementary Fig. 5b, and Fig. 4), indicating that the  
205 tumors were very heterogeneous. Previous studies showed that keratin 14 (*Krt14*) is a  
206 marker for disseminating early metastatic cells, and its deletion suppresses metastasis  
207<sup>12</sup>. Interestingly, within the nine distinct clusters of cells, we found one cluster (cluster 13)  
208 that expressed high levels of *Krt14* (Fig. 4b). Cluster 13 also expressed other epithelial  
209 markers, such as *Krt5*, *Krt7*, *Krt8*, *Krt17*, and *Krt18*. However, cluster 13 also expressed  
210 a relatively high level of Vimentin (*Vim*), an EMT marker. Previous studies have shown  
211 that the high expression of *Krt14* is also associated with the high expression of genes  
212 that regulate metastasis, such as Tenascin C (*Tnc*), Adam metallopeptidase (*Adamts1*),  
213 Caveolin 1 (*Cav1*), Jagged1 (*Jag1*), and Proepiregulin (*Ereg*)<sup>12</sup>. Indeed, cluster 13  
214 expressed high levels of *Tnc* and *Adamts1*, as well as *Cav1*, *Jag1*, and *Ereg* (Fig. 4b

Chen et al.

215 and Supplementary Table 1). Notably, cluster 11, which expressed high levels of  
216 vimentin, also expressed high levels of *Ereg* and *Adamts1* and relatively high levels of  
217 *Cav1* and *Jag1* (Fig. 4b). However, high *Krt14* expression, unlike in cluster 13, was not  
218 found in cluster 11. Paradoxically, cluster 13 expresses the highest level of E-cadherin  
219 (*cdh1*), whereas cluster 11 expresses the lowest level of *cdh1* (Supplementary Table 1).  
220 However, this is consistent with a recent report showing that E-cadherin is required for  
221 the survival of disseminating metastatic cells in this mouse model<sup>13</sup>.

222 Thereafter, we sequenced 3,979 single cell transcriptomes over 3 biological  
223 replicates from the macroscopic metastatic lesions in the lungs of *MMTV-PyMT* mice  
224 (Fig. 4c). The scRNA-seq results revealed five clusters (0, 1, 4, 5, and 11) that were  
225 derived from the primary tumors as determined by the high level of *PyMT* expression  
226 (Supplementary Fig. 5c, Supplementary Table 2). Among the five clusters, only one,  
227 cluster 11, expressed high levels of *Krt14* (Fig. 4d). After combining and re-clustering the  
228 primary and metastatic scRNA-seq results, we found that cluster 19 (Supplementary Fig.  
229 6, and supp. Table 4) consisted of cells from both the metastatic lung cluster 11 (Fig. 4c)  
230 and primary mammary tumor cluster 13 (Fig. 4a). This finding indicates that the last two  
231 clusters are similar and share a gene expression profile and traces a metastatic cluster  
232 found in the lung to a cluster in the primary tumors.

233 Micrometastases express high levels of *Krt14*, which are diminished in  
234 macrometastases<sup>12</sup>. Therefore, we analyzed the lungs of tumor-bearing mice that do not  
235 display macroscopic metastases. Consistently, we found only one cluster derived from  
236 the primary tumors, and this cluster expressed high levels of *Krt14* and *PyMT*  
237 (Supplementary Fig. 5d, e, Supplementary Table 3). Thus, among the distinct clusters in  
238 the primary tumors, we classified the high *Krt14*-expressing cluster as a pro-metastatic  
239 cluster.

240 Within the primary tumor, we also found nontumor cells that did not express  
241 *PyMT*, which include stromal cells, T cells, macrophages, and neutrophils (Fig. 4a).  
242 Importantly, a population of neutrophils was also found within the metastatic tumors in  
243 the lungs (Fig. 4c). Neutrophils play a pro-metastatic role in breast cancer<sup>14,15</sup>, and a  
244 high neutrophil to lymphocyte ratio (NLR) is associated with worse overall survival and  
245 disease-free survival<sup>16</sup>. Consistent with the reported pro-metastatic role of neutrophils  
246 that provide a niche for the metastatic cells in the lungs, we found that neutrophils within  
247 lung metastases and primary tumors express, in addition to high *Ly6g* and *Cxrc2*, which  
248 are known neutrophils markers, relatively high levels of *S100a8*, *S100a9*, *MMP8*, *MMP9*,



Chen et al.

249 *Bv8/Prok2* and vascular endothelial growth factor (*Vegfa*), which promote invasion and  
250 migration (Fig. 4d, e, and Supplementary Fig. 5e).

251 After the systemic deletion of Akt1 or Akt2, analysis of the tumors using Drop-seq  
252 (3,194 cells over 3 replicates and 4,647 cells over 3 replicates, respectively) revealed  
253 that primary tumors had similar cell clusters as those in control mice, including a  
254 prometastatic cluster expressing high Krt14, which is co-segregated in control wild type  
255 (WT), Akt1<sup>-/-</sup>, and Akt2<sup>-/-</sup> primary tumors (Supplementary Fig. 7, and supp. Table 5).  
256 Furthermore, the percentage of high Krt14-expressing cells in primary tumors after the  
257 systemic deletion of Akt1 or Akt2 was not significantly different from that in control  
258 primary tumors (Fig. 4c). These results suggest that the systemic Akt1 deletion did not  
259 change the relative presentation of the pro-metastatic cluster within the primary tumors.

260 While the presentation of a high Krt14-expressing cell cluster was similar in WT  
261 control mice and in mice after the systemic deletion of Akt1 or Akt2 (Fig. 4f, and supp.  
262 Table 5), the presentation of neutrophils was completely diminished after Akt1 systemic  
263 deletion (Fig. 4g, and supp. Fig. 7). These results raised the possibility that systemic  
264 Akt1 deletion inhibits metastasis by impairing neutrophil mobilization to the lung. To  
265 further assess this possibility, we examined whether systemic Akt1 deletion could affect  
266 pro-metastatic neutrophils in the lungs. The percentage of neutrophils in the lungs of  
267 non-tumor-bearing mice, as measured by anti-Ly6G staining, was not significantly  
268 different in control mice and in mice after either Akt1 or Akt2 systemic deletion (Fig. 5a).  
269 However, in tumor-bearing mice, the percentage of neutrophils in the lungs of control  
270 mice or in mice after Akt2 systemic deletion was markedly increased, whereas Akt1  
271 systemic deletion did not increase the percentage of neutrophils in the lungs (Fig. 5b).

272 If systemic Akt1 deletion inhibits metastasis by a systemic effect that impairs  
273 neutrophil mobilization to the lungs, then this deletion would also inhibit the metastasis of  
274 WT tumors. We therefore orthotopically implanted tumor cells derived from *MMTV-PyMT*  
275 mice into either *R26Cre<sup>ERT2</sup>*, *Akt1<sup>fl/fl</sup>;R26Cre<sup>ERT2</sup>*, or *Akt2<sup>fl/fl</sup>;R26Cre<sup>ERT2</sup>* mice. When the  
276 tumors became palpable, the mice were injected with tamoxifen to systemically delete  
277 Akt1 or Akt2. When the tumors reached the endpoint, the mice were analyzed for  
278 metastasis. The systemic deletion of Akt1 markedly decreased the metastasis of WT  
279 tumors (Fig. 5c), which is directly correlated with the decrease in tumor-associated  
280 neutrophils in the lungs (Fig. 5d). However, when compared to WT control mice, the  
281 systemic deletion of Akt2 did not decrease the metastasis of WT tumors (Fig. 5e) and  
282 did not significantly affect the percentage of neutrophils in the lungs (Fig. 5f).

Chen et al.

283           If the Akt1 deficiency in neutrophils determines decreased metastatic potential,  
284 then it is expected that the specific deletion of Akt1 in neutrophils could decrease  
285 metastasis. Therefore, we used *MRP8-Cre* mice <sup>17</sup> to delete Akt1 specifically in  
286 neutrophils. We orthotopically implanted E0771 mouse breast cancer cells into control  
287 *MRP8-Cre*, and *MRP8-Cre;Akt1<sup>ff</sup>* mice. As shown in Fig. 6a, lung metastasis was  
288 diminished in *MRP8-Cre;Akt1<sup>ff</sup>* mice compared to that of *MRP8-Cre* mice. Consistently,  
289 neutrophils were accumulated in the lungs of *MRP8-Cre* mice but markedly reduced in  
290 *MRP8-Cre;Akt1<sup>ff</sup>* mice (Fig. 6b). Thus, these results provide direct evidence that the  
291 systemic effect of the Akt1 deletion on metastasis is due to the effect on pro-metastatic  
292 or tumor-associated neutrophils.

293           To understand the mechanism by which Akt1 affects tumor-associated  
294 neutrophils, we isolated neutrophils from tumor-bearing mice and exposed these cells to  
295 granulocyte colony stimulating factor (G-CSF) in vitro. G-CSF was shown to promote the  
296 survival of neutrophils and is required for the mobilization of tumor-associated  
297 neutrophils <sup>14</sup>. As shown in Fig. 6c, G-CSF increased the survival of neutrophils isolated  
298 from either control or Akt2-deficient tumor-bearing mice but not the survival of  
299 neutrophils isolated from Akt1-deficient tumor-bearing mice. These results suggest that,  
300 at least in part, Akt1 deficiency decreases the survival of tumor-associated neutrophils.  
301 In mouse models of mammary gland tumors, the inhibition of translation initiation factor  
302 eIF4E decreases metastasis to the lungs by decreasing the mobilization of neutrophils to  
303 these organs <sup>18</sup>. This finding was attributed to the increase in neutrophil cell survival by  
304 eIF4E after exposure to G-CSF through the elevation of BCL2 and MCL1 <sup>18</sup>. Since Akt,  
305 which is upstream of mTORC1 and eIF4E <sup>19</sup>, could also affect the level of MCL1 through  
306 the inhibition of GSK3 and the increase in its protein stability <sup>20</sup>, we examined the level of  
307 MCL1 after exposure to G-CSF. We found that MCL1 protein levels are induced by G-  
308 CSF in neutrophils derived from either control or Akt2-deficient tumor-bearing mice but  
309 not in neutrophils derived from Akt1-deficient tumor-bearing mice (Fig. 6d). Thus, Akt1 is  
310 required downstream of G-CSF to promote elevated MCL1 protein. These results are  
311 consistent with other studies showing that MCL1 is particularly important for the survival  
312 of neutrophils and is induced by G-CSF <sup>21</sup>. One possible reason why Akt1 and not Akt2  
313 affects neutrophils in tumor-bearing mice is that Akt1 is the major expressed isoform in  
314 neutrophils of tumor bearing mice (supp. Fig. 8). Taken together, these results showed  
315 that the systemic effect of Akt1 deficiency on the inhibition of metastasis is due to the  
316 effect of Akt1 on the survival and mobilization of the neutrophils that promote metastasis.

Chen et al.

317

318 **Reducing insulin level after systemic Akt2 deletion inhibits mammary tumor**  
319 **development.**

320 Our results suggested that the systemic deletion of Akt2 curbs the inhibition of mammary  
321 gland tumorigenesis because of the high circulating levels of insulin that hyperactivates  
322 the other Akt isoforms and other pro-oncogenic signaling pathways (Fig. 2 and Fig. 3).  
323 To further assess this possibility, we treated mice with the diabetic drug, metformin, to  
324 decrease insulin levels after systemic Akt2 deletion. However, metformin was not able to  
325 reduce insulin levels in these mice. We therefore fed the mice with a diet that includes  
326 the sodium-glucose co-transporter (SGLT2), inhibitor, the anti-diabetic drug,  
327 canagliflozin. SGLT2 is responsible for reabsorption of glucose in the kidney, and  
328 therefore limits the excretion of glucose through the urine<sup>22</sup>. Inhibition of SGLT2 by its  
329 selective inhibitor, canagliflozin, was shown to inhibit hyperglycemia and  
330 hyperinsulinemia without adverse consequences<sup>22</sup>. As shown in Fig. 2d and 2h, the  
331 systemic deletion of Akt2 in *MMTV-ErbB2* and *MMTV;NIC* mice accelerated and  
332 exacerbated tumorigenesis, which was attributed to the high level of insulin. To affirm  
333 this possibility *MMTV-ErbB2;Akt2<sup>ff</sup>;R26Cre<sup>ERT2</sup>* or *MMTV-NIC;Akt2<sup>ff</sup>;R26Cre<sup>ERT2</sup>* mice  
334 were fed, after systemic Akt2 deletion, with a diet containing canagliflozin, with an  
335 average approximate dose of 40mg/kg BW/day. As shown in Fig. 7a,c canagliflozin  
336 substantially reduced the elevated insulin level observed after Akt2 systemic deletion.  
337 Consequently, the development of mammary gland tumorigenesis was markedly  
338 reduced when mice were treated with canagliflozin after systemic Akt2 deletion (Fig.  
339 7b,d). Thus, systemic deletion of Akt2 does not inhibit and may even accelerate  
340 mammary gland tumorigenesis by elevating blood insulin levels. Reducing insulin levels  
341 after systemic Akt2 deletion inhibits the acceleration of mammary gland tumorigenesis  
342 by systemic Akt2 deletion.

343

344

345 **Discussion**

346 The results described here underscore the importance of employing systemic deletion as  
347 a genetic proof of concept for cancer therapy, as cell autonomous deletion could  
348 otherwise be misleading. This notion was exemplified by the effect of the cell  
349 autonomous versus systemic deletion of Akt1 or Akt2 on breast cancer development and  
350 metastasis. Surprisingly, the cell autonomous deletion of Akt1 at tumor onset and after

Chen et al.

351 tumor formation did not inhibit metastasis, whereas systemic deletion of Akt1 markedly  
352 inhibited metastasis. We showed that the predominant mechanism by which systemic  
353 Akt1 deletion inhibits metastasis is by inhibiting the survival and mobilization of pro-  
354 metastatic neutrophils. These neutrophils express relatively high levels of prokineticin 2  
355 (PROK2) and VEGF $\alpha$ , which promote angiogenesis, as well as the metalloproteases  
356 MMP8 and MMP9, which promote invasion. These effects would allow the extravasation  
357 and mobilization of neutrophils but could also promote cancer cell angiogenesis and  
358 invasion. Neutrophils also physically interact with cancer cells <sup>23</sup>, and thus can increase  
359 the extravasation of disseminating cancer cells by expressing and secreting MMP8 and  
360 MMP9. More recently, it was shown that neutrophils actually escort disseminating cancer  
361 cells to the metastatic site <sup>24</sup>; thus, it is possible that these cells also promote cancer cell  
362 extravasation. In addition, neutrophils form neutrophil extracellular traps (NETs) that  
363 stimulate migration and invasion and trap natural killer cells <sup>25</sup>. The pro-metastatic role of  
364 neutrophils was also recognized in human cancer patients, and a high NLR is associated  
365 with a poor prognosis <sup>14</sup>. The neutrophils derived from tumor-bearing mice or from  
366 cancer patients are distinct from normal neutrophils, as tumor-associated neutrophils  
367 lack immunosuppressive activity and have a higher migration capacity <sup>26</sup>. Cancer cells  
368 promote the survival and mobilization of neutrophils by secreting G-CSF <sup>14,27</sup>. We  
369 showed that at least in vitro Akt1, and not Akt2, is required for the G-CSF-induced  
370 survival of neutrophils derived from tumor-bearing mice. The major mechanism by which  
371 G-CSF promotes the survival of neutrophils is by inducing the expression of the anti-  
372 apoptotic protein MCL1 <sup>21</sup>. We showed that Akt1 deficiency prohibits the induction of  
373 MCL1 expression by G-CSF. We cannot completely exclude, however, other potential  
374 mechanisms by which the Akt1 deficiency impairs the survival and mobilization of tumor-  
375 associated neutrophils. Notably, we found that Akt1 is the major expressed Akt isoform  
376 in neutrophils of tumor bearing mice and this could explain why systemic deletion of  
377 Akt1 and not Akt2 markedly affect the pro-metastatic neutrophils. Previous studies have  
378 shown the differential roles of Akt isoforms in neutrophil function. In contrast to our  
379 findings with respect to neutrophil function in tumor-bearing mice, the neutrophils derived  
380 from nontumor-bearing mice are more dependent on Akt2 than on Akt1 in response to  
381 stimulation by N-Formylmethionyl-leucyl-phenylalanine (fMLP) or phorbol myristate  
382 acetate (PMA) <sup>28</sup>. This finding could be explained by the change in the phenotype of  
383 these neutrophils in response to tumor formation and by the different stimuli used.  
384 Finally, It was speculated that in tumor bearing hosts there is a pressure to release

Chen et al.

385 neutrophils from the bone marrow prematurely and that these immature neutrophils can  
386 be converted to pro-tumorigenic pro-metastatic neutrophils<sup>29</sup>. We identified cluster 18 in  
387 supp. Fig. 6a and 6b, or cluster 21 in supp. Fig. 7a,c as neutrophils that are also present  
388 in the lung of tumor bearing mice but are missing after systemic deletion of Akt1 (Fig. 4g,  
389 and supp. Fig. 7c). These neutrophils were identified as the pro-metastatic neutrophils  
390 and express the highest RNA level of Ly6g and Cxcr2, which are known neutrophil  
391 markers. However, we also identified cluster 14 in supp. Fig. 7a, c, as a potential  
392 neutrophil progenitor population. This cluster had the second highest RNA expression of  
393 Cxcr2 with no expression of Ly6g. It is tempting to speculate that Akt1 might be required  
394 for the differentiation of the progenitor neutrophils population at the primary tumor site,  
395 but more work beyond the scope of this manuscript is required to assess this possibility.  
396 Nevertheless, there is no difference in the percentage of cells in cluster 14 between  
397 control mice and Akt1 or Akt2 deleted mice (supp. Fig. 7c).

398 Our studies also show that the expression of ErbB2 in the absence of Akt2 only  
399 in mammary gland cells cannot be tolerated and these cells are likely eliminated. We  
400 hypothesized that ErbB2 expression cannot be tolerated in mammary gland cells in  
401 which Akt activity is below a certain threshold level. Akt2 is expressed at the highest  
402 level whereas Akt1 is expressed at the lowest level in early stages of mammary gland  
403 tumorigenesis. Thus, it is possible that total Akt activity is more reduced at this stage in  
404 the absence of Akt2 than in the absence of Akt1. However, systemic Akt2 deletion,  
405 which increases insulin levels and hyperactivates Akt1 and possibly Akt3, overcomes the  
406 intolerance of ErbB2 expression in the absence of Akt2 in the mammary gland. In late  
407 stage tumor growth, Akt1 expression is elevated, and Akt2 expression declines; thus, the  
408 growth of tumor cells derived from *MMTV-ErbB2* mice is impaired to a much higher  
409 extent by Akt1 deletion than by Akt2 deletion. However, it remains to be determined how  
410 the cell autonomous deletion of Akt1, which is expressed at the highest level in late  
411 stages of tumor development, is tolerated in the presence of high ErbB2 expression.  
412 One possibility is that at late stages, the cells have already acquired additional lesions  
413 that enable the expression of ErbB2, despite low Akt activity.

414 The systemic deletion of Akt2 markedly increased tumor growth and metastasis  
415 in *MMTV-ErbB2* mice and did not inhibit tumor growth and metastasis in *MMTV-PyMT*  
416 mice. This effect was attributed to the high circulating levels of insulin as a consequence  
417 of systemic Akt2 deletion. Indeed, reducing insulin levels after the systemic deletion of  
418 Akt2 inhibits tumor onset. Recently it was shown that reducing insulin level after

Chen et al.

419 treatment with pan-PI3K inhibitors, which elevate insulin level, increased their efficacy<sup>30</sup>.  
420 Our results showed that downstream of PI3K inhibition, Akt2 inhibition is responsible for  
421 the elevated insulin.

422 Taken together, these results provide strong support for the use of systemic  
423 deletion as a proof of concept for cancer therapy. These results together with our  
424 previous results<sup>9,31</sup> provide support for using specific Akt1 inhibitors and avoiding Akt2  
425 or pan-Akt inhibitors for cancer therapy. Furthermore, the effect of Akt1 systemic  
426 deletion on pro-metastatic neutrophils, but not on other functions of neutrophils, indicate  
427 that Akt1 specific inhibitor would be sufficient to selectively inhibit the pro-metastatic  
428 effect of neutrophils.

429

430

Chen et al.

## 431 **Methods**

### 432 **Mouse strains and mouse work**

433 The *MMTV-NIC* mice and *MMTV-ErbB2* mice were gifts from W.J. Muller (McGill  
434 University). The *MMTV-PyMT* and *LSL-Luc* mice were purchased from Jackson  
435 Laboratory. The FVB/N WT mice were purchased from Charles River Laboratories. The  
436 *R26Cre<sup>ERT2</sup>* knockin mice (strain 01XAB) *Akt1<sup>ff</sup>*, and *Akt2<sup>ff</sup>*, *Akt1<sup>ff</sup>;R26Cre<sup>ERT2</sup>* and  
437 *Akt2<sup>ff</sup>;R26Cre<sup>ERT2</sup>* mice have been previously described <sup>9</sup>. *MMTV-*  
438 *PyMT;Akt1<sup>ff</sup>;R26Cre<sup>ERT2</sup>* and *MMTV- PyMT;Akt2<sup>ff</sup>;R26Cre<sup>ERT2</sup>* mice were generated  
439 by crossing *Akt1<sup>ff</sup>;R26Cre<sup>ERT2</sup>* or *Akt2<sup>ff</sup>;R26Cre<sup>ERT2</sup>* mice with *MMTV- PyMT* mice.  
440 *MMTV-ErbB2;Akt1<sup>ff</sup>;R26Cre<sup>ERT2</sup>* and *MMTV-ErbB2;Akt2<sup>ff</sup>;R26Cre<sup>ERT2</sup>* were generated  
441 by crossing *Akt1<sup>ff</sup>;R26Cre<sup>ERT2</sup>* or *Akt2<sup>ff</sup>;R26Cre<sup>ERT2</sup>* mice with *MMTV-ErbB2* mice.  
442 *MMTV-NIC;Akt1<sup>ff</sup>* and *MMTV-NIC;Akt2<sup>ff</sup>* mice were generated by crossing *Akt1<sup>ff</sup>* or  
443 *Akt2<sup>ff</sup>* with *MMTV-NIC* mice. *MMTV-NIC;Akt2<sup>ff</sup>;R26Cre<sup>ERT2</sup>* mice were generated by  
444 crossing *MMTV-NIC;Akt2<sup>ff</sup>* mice with *Akt2<sup>ff</sup>;R26Cre<sup>ERT2</sup>* mice. *MMTV-NIC;LSL-Luc*  
445 mice were generated by crossing *MMTV-NIC* mice with *LSL-Luc* mice. *MMTV-*  
446 *NIC;Akt1<sup>ff</sup>;LSL-Luc* mice and *MMTV-NIC;Akt2<sup>ff</sup>;LSL-Luc* were generated by crossing of  
447 *MMTV-NIC;LSL-Luc* mice with *Akt1<sup>ff</sup>* and *Akt2<sup>ff</sup>* mice respectively. All mouse models  
448 were produced in an FVB background. Mice from other backgrounds were backcrossed  
449 to FVB/N mice for at least 10 generations. Cre recombinase activation was performed by  
450 the IP injection of 0.1 ml of 20 mg/ml of tamoxifen for 5 consecutive days. For IP  
451 injection, tamoxifen was dissolved in corn oil at a final concentration of 20 mg/ml via  
452 shaking at 37°C for 30 minutes as previously described <sup>9</sup>. PCR, qPCR and western blot  
453 analysis of multiple tissues, including tumor tissues, were used to confirm the deletion of  
454 Akt isoforms. C57Bl6 *MRP8-Cre-ires-GFP* mice were purchased from Jackson  
455 Laboratory and were crossed with *Akt1<sup>ff</sup>* mice in C57Bl6 background to generate *MRP8-*  
456 *Cre;Akt1<sup>ff</sup>* mice. NOG mice were purchased from Jackson Laboratory. For the  
457 Canagliflozin diet experiments, the mice were injected with tamoxifen at 6 weeks of age  
458 and maintained on chow diet (Teklad #7012). On day 15, blood samples were collected  
459 from the tail vein using a heparinized micro-capillary tube to measure basal fed plasma  
460 glucose and insulin. Mice were then randomly divided into two groups. Canagliflozin  
461 (CANA) (MedChem Express, Monmouth Junction, NJ, USA) was administrated as a  
462 food additive at a concentration of 0.03% (w/w) into Teklad #7012 chow diet (Research  
463 Diets, Inc., New Brunswick, NJ, USA). Each group received control or CANA diet with ad

Chen et al.

464 libitum access to food until the day they are sacrificed. The average daily dose of  
465 canagliflozin (calculated from average daily food intake for mice and actual body weight)  
466 was approximately 40mg/kg BW/day, a dose effective in many studies<sup>32-34</sup>. The body  
467 weight of each mouse was measured every week. Fed plasma glucose and insulin levels  
468 were measured every 4 weeks. Starting at 6-month of age, mice were palpated each  
469 week for tumor appearance and age of appearance was recorded. All animal  
470 experiments were approved by the Institutional Animal Care and Use Committee of the  
471 University of Illinois at Chicago (UIC), as required by the United States Animal Welfare  
472 Act and the policy of NIH.

473

#### 474 **Primary tumor cell isolation**

475 Mouse tumor tissues were dissected, washed in PBS supplemented with 5% P/S  
476 (penicillin/streptomycin), cut into small pieces (diameter~3 mm), and then digested in 1%  
477 collagenase IV in DMEM at 37°C for 30 minutes with shaking. The supernatant was  
478 discarded after centrifugation at 300 g for 5 minutes. The pellet was washed several  
479 times with PBS and passed through a 75 µm cell strainer to collect small cell clumps.  
480 The clumps were then transferred to plates containing DMEM supplemented with 10%  
481 FBS and 1% P/S in an incubator at 37°C with 5% CO<sub>2</sub>.

482

#### 483 **Tumor cell transplantation**

484 Freshly isolated tumor cells (less than 3 days) were harvested and resuspended in PBS  
485 and Matrigel (Corning) in a 1:1 ratio with a final concentration of 0.1~1 x 10<sup>6</sup>/100 µl. One  
486 hundred microliters of cells were transplanted to the fourth mammary gland fat pad of  
487 each side to recipient mice. Mice were monitored/palpated daily for 1 week to confirm  
488 successful tumor transplantation. After the tumor diameter reached 4 mM, the tumor size  
489 was measured every week until a certain time point or a humane endpoint. Tumor sizes  
490 were measured with a caliper and calculated by length\*height\*width\*0.5. For  
491 transplantation E0771 mouse breast cancer cells, 1x10<sup>5</sup> cells were orthotopically  
492 transplanted into the mammary glands of *MRP8-Cre* and *MRP8-Cre;Akt1<sup>fl/fl</sup>* mice as  
493 described above. When primary tumors reached 0.5cm<sup>3</sup> the mice were analyzed for lung  
494 metastasis and neutrophils infiltration.

495



Chen et al.

496 **Bone marrow isolation**

497 After muscle removal, the femurs and tibias were collected and rinsed with 70% ethanol  
498 followed by ice-cold PBS wash. The epiphyses were cut off. Then, a 10-cc syringe filled  
499 with RPMI medium supplemented with 10% FBS and 2 mM EDTA was used to flush the  
500 marrow cells from both ends with a 25-gauge needle into a 50 ml Falcon tube with a 40  
501  $\mu\text{m}$  cell strainer. After centrifugation at 1000 rpm for 5 min, the pellet was resuspended  
502 in 3 mL cold ammonium chloride potassium (ACK) lysis buffer for 1 min, centrifuged and  
503 washed with PBS and resuspended in the desired volume.

504

505 **Neutrophil isolation**

506 Bone marrow-derived neutrophils were isolated from mice using the following protocol  
507 adapted from Swamydas *et al.*<sup>6</sup>. Bone marrow cells were obtained from mice by flushing  
508 the contents of the tibia and femur with complete RPMI medium supplemented with 2  
509 mM EDTA using a 25-gauge needle. The cell suspension was run through a 100  $\mu\text{m}$  cell  
510 strainer. The cells were pelleted at 430xg for 7 minutes at 4°C. Red blood cells were  
511 lysed by washing the cells with 20 mL of 0.2% NaCl for 20 seconds followed by the  
512 addition of 20 mL of 1.6% NaCl. After washing with PBS, the bone marrow cells were  
513 resuspended in ice-cold PBS and layered on the top of a Histopaque 1119/1077 (Sigma)  
514 gradient in a 15 mL Falcon tube. After centrifugation at 2000 rpm at room temperature  
515 for 30 minutes (without the break), the neutrophils were isolated by collecting the cells at  
516 the interface of the two Histopaque layers. The neutrophils were then washed twice with  
517 complete RPMI medium. Neutrophil viability and purity were assessed via trypan blue  
518 staining and flow cytometric analysis of Ly6G surface expression by using a PE-Ly6G  
519 antibody (Biolegend).

520

521 **Cell culture**

522 Freshly isolated mouse breast tumor cells were cultured in high glucose DMEM  
523 supplemented with 10% FBS and 1% P/S. Freshly isolated neutrophils were cultured in  
524 RPMI 1640 supplemented with 10% FBS and 1% P/S.

525

526

Chen et al.

527

### 528 **Neutrophil cell death assay**

529 Freshly isolated neutrophils were cultured with or without G-CSF at a final concentration  
530 of 100 ng/ml for 24 hours. The neutrophils were then stained with Hoechst stain and  
531 propidium iodide (PI) for 30 minutes in an incubator followed by plate scanning with a  
532 Celigo Imaging Cytometer. The dead cell/live cell ratio was determined by the red cell  
533 number (PI stained)/blue cell number (Hoechst stained) ratio.

534

### 535 **Measurement of glucose, insulin, and IL-6 levels**

536 Glucose levels were measured with a glucometer test strip (Precision Xtra; Abbott  
537 Laboratories). Insulin levels were measured by Milliplex immunoassay (Millipore)  
538 according to the manufacturer's instructions.

539

### 540 **Tissue staining and immunohistochemistry**

541 Breast tumor tissues were freshly collected and directly fixed in 10% formalin (Fisher  
542 Chemical). The lungs were inflated with PBS via the trachea and then removed from the  
543 ribcage, washed in PBS and dissected to lobules, before fixing in 10% formalin. After  
544 fixation for 24-48 hours (depending on tissue size) in formalin, the tissues were  
545 processed and embedded in paraffin blocks. The sections (5  $\mu$ m) were stained with  
546 hematoxylin and eosin (H&E). For immunohistochemistry, antigen retrieval was  
547 performed by incubating the sections in 0.01 M sodium citrate (pH 6.0) at 95°C for 20  
548 minutes, followed by cooling down to room temperature. The sections were treated with  
549 0.3% H<sub>2</sub>O<sub>2</sub> for 5 minutes to quench endogenous hydrogen peroxide. After blocking with  
550 normal serum, the sections were incubated with primary antibody at 4°C overnight. After  
551 incubation with the appropriate secondary antibodies from Vectastain ImmPress Kits  
552 (Vector Labs), a 3, 3'-diaminobenzidine (DAB) kit (Vector Labs) was applied to visualize  
553 the signal. The sections were then lightly counterstained with hematoxylin. To determine  
554 the lung metastatic incidence metastatic nodules were counted under the microscope  
555 after H&E staining. Infiltration of neutrophils to the lungs was quantified histology  
556 staining for Ly6G antibody. Pictures of 5 random fields were taken from each lung

Chen et al.

557 section. Quantification was performed via ImageJ. Lung neutrophil percentage = Ly6G  
558 positive cell number / total cell number in the lung.

559

560

### 561 **Protein analysis by immunoblotting**

562 The cells were harvested and washed with cold PBS and lysed in lysis buffer [20 mM  
563 HEPES, 1% Triton X-100 (TX-100), 150 mM NaCl, 1 mM EGTA, 1 mM EDTA] containing  
564 phosphatase inhibitors (10 mM sodium pyrophosphate, 20 mM  $\beta$ -glycerol-  
565 glycerophosphate, 100 mM sodium fluoride, 5 mM indoleacetic acid, 20 nM oleic acid)  
566 and a Pierce™ protease inhibitor mini tablet inhibitor and a Pierce™ phosphatase  
567 inhibitor mini tablet inhibitor (1 tablet per 10 mL lysis buffer). After sonication on ice, the  
568 solubilized proteins were collected by centrifugation, and the protein concentration was  
569 measured via a Bio-Rad protein assay. An equal amount of protein was aliquoted into  
570 Laemmli buffer, boiled for 5 minutes and processed by standard western blot  
571 procedures. The membranes were blocked with 5% skim milk in TBS with 0.1% Tween-  
572 20 for 1 hour at room temperature and incubated with specific primary antibodies at 4°C  
573 overnight. Enhanced chemiluminescence (ECL) western blot substrate was used for film  
574 development, and ImageJ was used for data quantification. The tissue samples collected  
575 from the animal were snap frozen in a dry ice-ethanol mixture and preserved at -80°C  
576 until needed for the experiment. The tissue samples for western blotting were  
577 homogenized in ice-cold lysis buffer and processed as stated above.

578

### 579 **Single cell RNA-seq**

580 Mouse tumor tissues were dissected, washed in PBS, cut into small pieces and then  
581 digested in 1% collagenase IV in DMEM at 37 °C for 45 minutes with shaking. Cell debris  
582 and red blood cells were removed with centrifuging and ACK lysis buffer. The cell pellets  
583 were washed with PBS and passed through a 40  $\mu$ m cell strainer to form a single cell  
584 suspension and counted with trypan blue to determine cell number and viability. A  
585 sequencing library was constructed according to the Drop-Seq protocol<sup>11,35</sup>. Briefly,  
586 approximately  $1.5-2.0 \times 10^5$  cells were resuspended in 1 mL 0.1% BSA PBS and loaded  
587 onto a microfluidic chip to isolate single cell droplets. The collected droplets were broken  
588 to release barcoded beads and resuspended in reverse transcriptase mix. After reverse

Chen et al.

589 transcription, the beads were treated with exonuclease I to remove unhybridized DNA,  
590 followed by PCR amplification. The amplified products were sent to the UIC Research  
591 Resources Center (RRC) to check the cDNA quality and quantity with TapeStation and  
592 Qubit. The libraries were constructed using the Nextera XT kit and then sequenced with  
593 the Illumina Nextseq 500 at RRC. The reading depth was approximately 40,000 per cell.  
594 Read 1 was 20 base pairs (bp) to determine the cell barcode and unique molecular  
595 identifier (UMI); read 2 was 63 bp to determine the cDNA region.

## 596 **Bioinformatics data processing and analysis**

597 Raw sequence data were filtered, trimmed and then aligned to the mouse genome  
598 (mm10). Uniquely mapped reads were grouped and counted to generate digital  
599 expression matrices and subjected to Seurat package (version v2.2.1) using R (version  
600 3.3.2) to perform a single cell analysis<sup>11,35</sup>.

601

## **Materials**

|                                                            |                          |                    |
|------------------------------------------------------------|--------------------------|--------------------|
| Xylenes (Histological), Fisher Chemical                    | Fisher Scientific        | Cat. # X3S-4       |
| Hematoxylin Solution, Harris Modified                      | Sigma-Aldrich            | Cat. # HHS32-1L    |
| Eosin Y solution, alcoholic                                | Sigma-Aldrich            | Cat. # HT110116    |
| Recombinant Mouse G-CSF Protein                            | R&D Systems              | Cat. # 414-CS-025  |
| Pierce™ ECL Western Blotting Substrate                     | Thermo Fisher Scientific | Cat. # 32106       |
| Pierce™ Protease Inhibitor Mini Tablets                    | Thermo Fisher Scientific | Cat. # A32953      |
| Pierce™ Phosphatase Inhibitor Mini Tablets                 | Thermo Fisher Scientific | Cat. # A32957      |
| HyClone™ Dulbecco's High Glucose Modified Eagles<br>Medium | Fisher Scientific        | Cat. #SH30022.01   |
| HyClone™ RPMI 1640 Media                                   | Fisher Scientific        | Cat. #SH30027.01   |
| HyClone™ Phosphate Buffered Saline (PBS)                   | Fisher Scientific        | Cat. #SH30256.01   |
| Propidium iodide                                           | Sigma-Aldrich            | Cat. # P4170-25MG  |
| Hoechst 33342, trihydrochloride, trihydrate                | Thermo Fisher Scientific | Cat. # H3569       |
| Histopaque®-1077                                           | Sigma-Aldrich            | Cat. # 10771-100ML |
| Histopaque®-1119                                           | Sigma-Aldrich            | Cat. # 11191-100ML |
| Gibco™ ACK Lysing Buffer                                   | Fisher Scientific        | Cat. # A1049201    |
| Corning Matrigel Matrix                                    | Corning Life Sciences    | Cat. # 354230      |
| Collagenase, Type 4                                        | Worthington              | Cat. #LS004188     |
| Tamoxifen                                                  | Sigma-Aldrich            | Cat. #T5648-5G     |
| Corn Oil                                                   | Sigma-Aldrich            | Cat. #C8267-500ML  |
| MK-2206                                                    | Selleck Chem             | Cat. #S1078        |

## **Commercial kit Assays**

Chen et al.

MILLIPLEX MAP Mouse Metabolic Hormone  
Magnetic Bead Panel

MilliporeSigma

Cat. # MMHMAG-44K

602

603

604

### Antibodies

Monoclonal rabbit anti-pan Akt (clone C67E7)

Cell Signaling Technology

Cat. # 4691

Monoclonal rabbit anti-Akt1 (clone C73H10)

Cell Signaling Technology

Cat. # 2938

Monoclonal rabbit anti-Akt2 (clone D6G47)

Cell Signaling Technology

Cat. # 3063

Polyclonal rabbit anti-pSer473 pan Akt

Cell Signaling Technology

Cat. # 9271

Polyclonal rabbit anti-pSer308 pan Akt

Cell Signaling Technology

Cat. # 9275

Monoclonal rabbit anti-pSer473 Akt1 (clone D7F10)

Cell Signaling Technology

Cat. # 9018

Monoclonal rabbit anti-pSer474 Akt2 (clone D3H2)

Cell Signaling Technology

Cat. # 8599

Monoclonal rabbit anti-PRAS40 (clone D23C7)

Cell Signaling Technology

Cat. # 2691

Monoclonal rabbit anti-phospho PRAS40 (clone C77D7)

Cell Signaling Technology

Cat. # 2997

Monoclonal rabbit anti-GSK-3-beta (clone D5C5Z)

Cell Signaling Technology

Cat. # 12456

Monoclonal rabbit anti-p-GSK-3-beta (clone D85E12)

Cell Signaling Technology

Cat. # 5558

Monoclonal rabbit anti-GAPDH (clone 14C10)

Cell Signaling Technology

Cat. # 2118

Monoclonal rabbit anti-b-Actin (clone 13E5)

Cell Signaling Technology

Cat. # 4970

Monoclonal rat anti-Ly6G (clone 1A8)

Biologend

Cat. # 127601

Monoclonal rabbit anti-Ki67 (clone SP6)

Abcam

Cat. # ab16667

605

606

607

### Acknowledgments

608

N.H. acknowledges the support from NIH grants R01AG016927, R01CA090764, and

609

R01 CA206167, the VA merit award BX000733, and the VA research career scientist

610

award IK6BX004602. X.C. acknowledges the support from the center for clinical and

611

translational science. C.B acknowledges the support from F30CA228191. W.P.

612

acknowledges the support from T32HL007829. M.M.A acknowledges the support from

613

the center for clinical and translational science. M.V.F. acknowledges the support from

614

NIH grants R01GM093827 and R35GM131707. We would like to thank Ling Jin for

615

maintaining and genotyping the mice. N.H. would like to thank Louis Philipson (University

616

of Chicago) for the suggestion to use SGLT2 inhibitors.

617

618

### Author Contributions

619

620

N.H. and X.C. conceived the study. N.H., X.C., G.R., V.N. C.B. and W.P. designed the

621

experiments. X.C. generated the mouse models and performed most of the experiments.

622

M.M.A and X.C. conceived the Drop-seq experiments. M.M.A performed and analyzed

623

the Drop-seq experiment and supervised by M.V.P. and A.B.M.M.K.I. G.R. designed and

624

performed the experiments in Fig. 1d and experiments with Mrp8-Cre mice. V.N.

Chen et al.

625 designed and performed the experiments in Fig. 2h, 2i, and Fig. 7. W.P. analyzed  
626 neutrophils from tumor bearing mice. N.H., X.C. and M.M.A wrote the manuscript.

627

628

629

Chen et al.

630 **Figure legends**

631

632 **Figure 1: The effect of the Akt1 or Akt2 cell autonomous deletion on ErbB2-**  
633 **mediated mammary primary tumors and metastasis. a.** Schematic showing the Neu-  
634 IRES-Cre (NIC) transgene and breeding scheme to generate *MMTV-NIC-Akt1<sup>ff</sup>* and  
635 *MMTV-NIC-Akt2<sup>ff</sup>* mice. **b.** Kaplan-Meier plots showing tumor-free survival of *MMTV-*  
636 *NIC*, *MMTV-NIC-Akt1<sup>ff</sup>*, *MMTV-NIC-Akt2<sup>ff</sup>* and *MMTV-NIC-Akt2<sup>+ff</sup>* mice. The number of  
637 mice is indicated.  $p < 0.0001$  *MMTV-NIC* versus *MMTV-NIC-Akt1<sup>ff</sup>* and *MMTV-NIC-Akt2<sup>ff</sup>*,  
638  $p > 0.05$ , *MMTV-NIC* versus *MMTV-NIC-Akt1<sup>+ff</sup>* using the log-rank test. **c.** Immunoblot  
639 showing ErbB2, ErbB3, Akt1 and Akt2 protein expression in the mammary glands of  
640 *MMTV-NIC*, *MMTV-NIC;Akt1<sup>ff</sup>* and *MMTV-NIC;Akt2<sup>ff</sup>* mice. **d.** Luminescent imaging  
641 showing luciferase expression in *MMTV-NIC;LSL-Luc*, *MMTV-NIC;Akt1<sup>ff</sup>;LSL-Luc*,  
642 *MMTV-NIC;Akt2<sup>+ff</sup>;LSL-Luc*, and *MMTV-NIC;Akt2<sup>ff</sup>;LSL-Luc* mice. **e.** Representative  
643 immunoblot showing the expression of Akt1 and Akt2 during primary tumor development  
644 in *MMTV-NIC* mice. **f.** Table summarizing the incidence of lung metastasis in *MMTV-NIC*  
645 and *MMTV-NIC;Akt1<sup>ff</sup>* mice. The mice were sacrificed at the primary tumor endpoint, and  
646 the lungs were scored for metastasis.

647

648 **Figure 2: Consequences of the systemic deletion of Akt1 or Akt2 after tumor onset**  
649 **in *MMTV-ErbB2* mice. a.** The genotypes of mice and experimental strategy. **b.** Tumor  
650 volume at 5 weeks after tamoxifen injection. Data are presented as the means  $\pm$  SEM.  
651  $p < 0.001$  *MMTV-ErbB2;Akt1<sup>ff</sup>;R26Cre<sup>ERT2</sup>* vs. *MMTV-ErbB2;R26Cre<sup>ERT2</sup>*,  $p < 0.025$  *MMTV-*  
652 *ErbB2;Akt2<sup>ff</sup>;R26Cre<sup>ERT2</sup>* vs. *MMTV-ErbB2;R26Cre<sup>ERT2</sup>*, using an unpaired t test. **c.**  
653 Percentage of Ki67-positive cells in tumor sections. Data are presented as the means  
654  $\pm$  SEM.  $P = 0.017$ , *MMTV-ErbB2;Akt1<sup>ff</sup>;R26Cre<sup>ERT2</sup>* vs. *MMTV-ErbB2;R26Cre<sup>ER</sup>*.  $P = 0.006$ ,  
655 *MMTV-ErbB2;Akt2<sup>ff</sup>;R26Cre<sup>ERT2</sup>* vs. *MMTV-ErbB2;R26Cre<sup>ERT2</sup>* using an unpaired t test.  
656 **d.** Kaplan-Meier survival curves as determined by tumor endpoint.  $P = 0.0007$ , *MMTV-*  
657 *ErbB2;Akt1<sup>ff</sup>;R26Cre<sup>ERT2</sup>* vs. *MMTV-ErbB2;R26Cre<sup>ER</sup>*.  $P = 0.0018$ , *MMTV-*  
658 *ErbB2;Akt2<sup>ff</sup>;R26Cre<sup>ERT2</sup>* vs. *MMTV-ErbB2;R26Cre<sup>ERT2</sup>*. **e.** Table summarizing the  
659 incidence of lung metastasis. **f.** Circulating levels of insulin in the absence of or after  
660 tamoxifen injection. Data are presented as the means  $\pm$  SEM.  $P = 0.0005$ , *MMTV-*  
661 *ErbB2;Akt2<sup>ff</sup>;R26Cre<sup>ERT2</sup>* vs. *MMTV-ErbB2;R26Cre<sup>ERT2</sup>*. **g.** Quantification of  
662 phosphorylated PRAS40, GSK3b, and Akt1(pSer473) relative to total PRAS40, GSK3b,

Chen et al.

663 and Akt1 in tumor extracts after tamoxifen injection into *MMTV-ErbB2;R26Cre<sup>ERT2</sup>* or  
664 *MMTV-ErbB2;Akt2<sup>ff</sup>;R26Cre<sup>ERT2</sup>* mice. Data are presented as the means  $\pm$  SEM.  $P < 0.03$   
665 using an unpaired t test. **h.** Kaplan-Meier plot of tumor-free survival after tamoxifen  
666 injection into one-month-old *MMTV-NIC;Akt2<sup>ff</sup>;R26Cre<sup>ERT2</sup>* mice. **i.** Quantification of  
667 phosphorylated Akt1 (ser473), phosphorylated pan-Akt (ser473), phosphorylated  
668 PRAS40, and phosphorylated GSK3b, relative to total Akt1, total pan-Akt, total PRAS40,  
669 and total GSK3 in tumor extracts. Data are presented as the means  $\pm$  SEM.  $P < 0.05$   
670 using an unpaired t test.

671

672 **Figure 3: Consequences of systemic deletion of Akt1 or Akt2 after tumor onset in**  
673 ***MMTV-PyMT* mice.** **a.** The genotypes of mice and experimental strategy. **b.** Kaplan-  
674 Meier survival curves as determined by the tumor endpoint.  $p = 0.0092$ , *MMTV-*  
675 *PyMT;Akt1<sup>ff</sup>;R26Cre<sup>ERT2</sup>* vs. *MMTV-PyMT;R26Cre<sup>ERT2</sup>*. **c.** Quantification of lung  
676 metastatic nodules. Data are presented as the means  $\pm$  SEM.  $P = 0.0066$ , *MMTV-*  
677 *PyMT;Akt1<sup>ff</sup>;R26Cre<sup>ERT2</sup>* vs. *MMTV-PyMT;R26Cre<sup>ERT2</sup>*. **d.** Quantification of lung  
678 metastatic nodules after orthotopic transplantation of *MMTV-PyMT;Akt1<sup>ff</sup>;R26Cre<sup>ERT2</sup>*  
679 cells into NOG mice in the presence or absence of Akt1. Data are presented as the  
680 means  $\pm$  SEM.  $P = 0.919$ , using an unpaired t test. **e.** Quantification of lung metastasis  
681 nodules after the orthotopic transplantation of *MMTV-PyMT;Akt2<sup>ff</sup>;R26Cre<sup>ERT2</sup>* cells into  
682 NOG mice in the presence or absence of Akt2. Data are presented as the means  $\pm$   
683 SEM.  $P = 0.789$ , using an unpaired t test. **f.** Quantification of phosphorylated PRAS40,  
684 GSK3b, and Akt1 relative to total PRAS40, GSK3b, and Akt1 in tumor extracts after  
685 tamoxifen injection into *MMTV-PyMT;R26Cre<sup>ERT2</sup>*, *MMTV-PyMT;Akt1<sup>ff</sup>;R26Cre<sup>ERT2</sup>*, and  
686 *MMTV-PyMT;Akt2<sup>ff</sup>;R26Cre<sup>ERT2</sup>* mice. Data are presented as the means  $\pm$  SEM.  
687  $P < 0.05$ , using an unpaired t test.

688

689 **Figure 4. Analysis of primary and metastatic tumors by scRNA-seq.** **a.** t-Distributed  
690 Stochastic Neighbor Embedding (t-SNE) plot of primary mammary gland tumors in  
691 *MMTV-PyMT* mice. Each cluster is characterized by a unique gene expression  
692 signature. A total of 7,791 primary breast tumor cells ( $N = 5$ ) were used. Clusters 0, 1, 2,  
693 3, 4, 5, 6, 11, and 13 are tumor cells expressing *PyMT*, whereas the remaining clusters  
694 are non-tumor cells. The clusters are color-coded. **b.** Dot plot showing expression of  
695 metastatic markers *Ereg*, *Jag1*, *Cav1*, *Adamts1*, *Tnc*, *Vim*, as well as *Krt18*, *Krt17*, *Krt8*,  
696 *Krt7*, *Krt5*, and *Krt14* across the *PyMT* primary tumor clusters. **c.** tSNE plot of 3,979



Chen et al.

697 metastatic tumor cells in the lung (N = 3). Clusters 0, 1, 4, 5 and 11 are *PyMT*-positive.  
698 **d.** Dot plot depicting expression of *Prok2*, *Vegfa*, *Mmp9*, *Mmp8*, *S100a9*, *S100a8*, and  
699 the prometastatic marker *Krt14* across the clusters in the lung metastatic scRNA-seq  
700 analysis. **e.** Dot plot in the primary non-tumor clusters indicate that cluster 10 has a  
701 predominant gene expression profile of neutrophil markers *Prok2*, *Vegfa*, *Mmp9*, *Mmp8*,  
702 *S100a9*, *S100a8*. **f.** Graph showing the average number of pro-metastatic *Krt14*-positive  
703 cells for every 5,000 *PyMT*-positive tumor cells based on the scRNA-seq results.  
704  $N(\text{MMTV-PyMT}) = 5$ ,  $N(\text{MMTV-PyMT}; Akt1^{ff}) = 3$ ,  $N(\text{MMTV-PyMT}; Akt2^{ff}) = 3$ . N. S = not  
705 significant ( $p > 0.05$ ). One-way analysis of variance (ANOVA) was used to calculate  
706 significance. **g.** Graph showing the average number of infiltrating neutrophils in each  
707 genotype. scRNA-seq reveals the absence of neutrophil cells in primary systemic *Akt1*  
708 knockout tumors across all 3 biological replicates.  $N(\text{MMTV-PyMT}) = 5$ ,  $N(\text{MMTV-PyMT};$   
709  $Akt1^{ff}) = 3$ ,  $N(\text{MMTV-PyMT}; Akt2^{ff}) = 3$ . N.S = not significant ( $p > 0.05$ ). One-way ANOVA  
710 was used to calculate significance. Error bars represent standard error.

711

712 **Figure 5. The effect of the systemic Akt1 or Akt2 deletion on neutrophil**  
713 **accumulation in the lungs of tumor-bearing mice. a.** Percentage of neutrophils in the  
714 lungs of nontumor-bearing mice after tamoxifen injection to systemically delete Akt1 or  
715 Akt2. The percentage of neutrophils was calculated by counting the number of Ly6G-  
716 positive cells relative to total hematoxylin and eosin-stained cells in lung tissue at  
717 endpoint sections as described in the Methods section. Data are presented as the  
718 means  $\pm$  SEM.  $P = 0.3$ , using unpaired t test. **b.** Left: Quantification of lung neutrophils  
719 in control *MMTV-PyMT* mice and after systemic deletion of Akt1 or Akt2. Right:  
720 Representative lung section images stained with anti-Ly6G. Quantification was  
721 performed after the primary tumors reached the endpoint. Data are presented as the  
722 means  $\pm$  SEM.  $P = 0.0066$ , *MMTV-PyMT;Akt1<sup>ff</sup>;R26Cre<sup>ERT2</sup>* vs. *MMTV-PyMT;R26Cre<sup>ERT2</sup>*  
723 and  $p = 0.518$ , *MMTV-PyMT;Akt2<sup>ff</sup>;R26Cre<sup>ERT2</sup>* vs. *MMTV-PyMT;R26Cre<sup>ERT2</sup>* using an  
724 unpaired t test. Quantification of metastatic nodules (**c**) and neutrophils (**d**) in the lungs  
725 of *R26Cre<sup>ERT2</sup>* and *Akt1<sup>ff</sup>;R26Cre<sup>ERT2</sup>* mice orthotopically transplanted with *MMTV-PyMT*  
726 tumor cells and injected with tamoxifen at palpation. Quantification was performed when  
727 the primary tumors reached the endpoint. Data are presented as the means  $\pm$  SEM.  
728  $P = 0.019$  for metastatic nodules, and  $P = 0.0034$  for neutrophils using an unpaired t test.  
729 Quantification of metastatic nodules (**e**) and neutrophils (**f**) in the lungs of *R26Cre<sup>ERT2</sup>*  
730 and *Akt2<sup>ff</sup>;R26Cre<sup>ERT2</sup>* mice orthotopically transplanted with *MMTV-PyMT* tumor cells

Chen et al.

731 and injected with tamoxifen at palpation. Quantification was performed when the primary  
732 tumors reached the endpoint. Data are presented as the means  $\pm$ SEM.  $P > 0.05$  for  
733 metastatic nodules and neutrophils using an unpaired t test.

734

735 **Figure 6. Consequences of Akt isoform deletion in the neutrophils of tumor-**  
736 **bearing mice. a.** The effect of Akt1 deletion on metastasis in *MRP8-Cre* mice after  
737 orthotopic transplantation of E0771 cells. Upper panel: Schematic of experimental  
738 design. Bottom panel: Quantification of metastasis. **b.** The effect of Akt1 deletion on  
739 neutrophils in the lungs of *MRP8-Cre* tumor-bearing mice (n=8). Upper panels show  
740 representative lung section images stained with anti-Ly6G. Data are presented as the  
741 means  $\pm$ SEM.  $P < 0.0001$ , for metastatic nodules and neutrophils using an unpaired t  
742 test. **c.** The effect of G-CSF on the survival of neutrophils isolated from control, and  
743 systemically deleted Akt1 and Akt2 tumor-bearing mice. **d.** The effect of G-CSF on the  
744 level of MCL1 in neutrophils isolated from control and systemically deleted Akt1 and  
745 Akt2 tumor-bearing mice.

746

747

748 **Figure 7. Reducing circulating levels of insulin by SGLT2 inhibitor attenuates the**  
749 **mammary gland tumorigenesis after systemic Akt2 deletion.** *MMTV-*  
750 *ErbB2;Akt2<sup>ff</sup>;R26Cre<sup>ERT2</sup>* or *MMTV-ErbB2;Akt2<sup>ff</sup>;R26Cre<sup>ERT2</sup>* mice were injected with  
751 tamoxifen at one month of age and were subjected to either control chow diet or diet that  
752 includes canagliflozin (CANA). **a,c.** Insulin level after chow diet or CANA diet. **b,d.**  
753 Tumor onset after chow diet or CANA diet.

754

755

Chen et al.

756 **Supplementary figure legends**

757 **Supplementary Figure 1: Breeding schemes.** **a.** Breeding to generate a high Her2  
758 mouse model with mammary gland-specific deletion of Akt1 or Akt2 to determine the cell  
759 autonomous effect. **b.** Breeding to determine the systemic effect of Akt1 or Akt2 deletion  
760 in high Her2 (left panel) and luminal B (right panel) mouse models.

761

762 **Supplementary Figure 2a:** Representative immunoblot showing the phosphorylation of  
763 Akt1 (pSer473), GSK3b, and PRAS40 in mammary gland tumors derived from control  
764 *MMTV-ErbB2;R26Cre<sup>ERT2</sup>* or *MMTV-ErbB2;Akt2<sup>ff</sup>;R26Cre<sup>ERT2</sup>* mice after the systemic  
765 deletion of Akt2. Extracts from individual tumors in four different mice were used.  
766 Immunoblots were used for quantifications in Fig. 2g.

767

768 **Supplementary Figure 2b:** Representative immunoblots showing expression of Akt1,  
769 Akt2, Akt3, and total Akt, GSK3b, PRAS40, phosphorylation of Akt1 (pSer473),  
770 phosphorylation of pan-Akt (pSer473), phosphorylation of GSK3b, and PRAS40 in  
771 mammary gland tumors derived from control *MMTV-NIC* or *MMTV-*  
772 *NIC;Akt2<sup>ff</sup>;R26Cre<sup>ERT2</sup>* mice after the systemic deletion of Akt2. Extracts from individual  
773 tumors in nine different mice were used. Immunoblots were used for quantifications in  
774 Fig. 2i.

775

776 **Supplementary Figure 3: Cell autonomous deletion of Akt1 or Akt2 in**  
777 **orthotopically transplanted tumors in NOG mice.** **a.** Tumor growth curve of mammary  
778 tumor cells derived from *MMTV-ErbB2;Akt1<sup>ff</sup>;R26RCre<sup>ERT2</sup>* mice and orthotopically  
779 implanted into the mammary fat pad of NOG mice. After palpation, the mice were either  
780 treated or not treated with tamoxifen to delete Akt1. Cell autonomous Akt1 deletion  
781 significantly impaired tumor growth (n=8, p<0.001). **b.** Tumor growth curve of mammary  
782 tumor cells derived from *MMTV-ErbB2;Akt2<sup>ff</sup>;R26RCre<sup>ERT2</sup>* mice and orthotopically  
783 implanted into the mammary fat pad of NOG mice. After palpation, the mice were either  
784 treated or not treated with tamoxifen to delete Akt2. Cell autonomous Akt2 deletion  
785 significantly impaired tumor growth (n=8, p<0.001). **c.** Representative immunoblot  
786 showing the level of total Akt expression in orthotopic tumors after the deletion of Akt1 or  
787 Akt2.

788

789 **Supplementary Figure 4:** Representative immunoblot showing the phosphorylation of

Chen et al.

790 GSK3b and PRAS40 in mammary gland tumors derived from control *MMTV-*  
791 *PyMT;R26Cre<sup>ERT2</sup>* mice or after the systemic deletion of Akt2. Extracts from individual  
792 tumors in three different mice were used.

793

794 **Supplementary Figure 5:** **a.** Heatmap showing distinct markers in each cluster using  
795 scRNA-seq on the primary *MMTV-PyMT* breast tumor tissue. **b.** Feature plot showing  
796 the cells expressing *PyMT* in the primary breast tumor analysis. **c.** Feature plot showing  
797 the cells expressing *PyMT* in the metastatic lung tumor analysis. **d.** Analysis of lung  
798 micrometastatic lesions revealing prometastatic cluster 5. **e.** Dot plot showing the  
799 expression of *PyMT* and *Krt14* in cluster 5 only in the micrometastasis analysis.

800

801 **Supplementary Figure 6:** **a.** A combined tSNE plot of 7,791 primary breast tumor cells  
802 (N = 5) and 3,979 metastatic lung tumor cells (N = 3). Cluster 19 - the pro-metastatic  
803 cluster is circled. **b.** tSNE showing the cell of origin of the analysis in a. The circle shows  
804 that cluster 19 is made of both wild type (WT) primary breast cells in blue and metastatic  
805 lung (met) cells in salmon. **c.** Feature plot showing expression of *Krt14* on the tSNE  
806 localized in cluster 19.

807

808 **Supplementary Figure 7:** **a.** A combined tSNE plot of 7,791 primary breast tumor cells  
809 (N = 5), 3,194 cells of primary tumors following systemic *Akt1* deletion (N = 3), and 4,647  
810 cells of primary tumors following systemic *Akt2* deletion (N = 3). Cluster 13 - the pro-  
811 metastatic population, is circled. **b.** Feature plot showing the expression of *Krt14* on the  
812 tSNE localized in cluster 13. **c.** tSNE showing the cell of origin of the analysis in a. The  
813 circle shows that cluster 13 consists of WT cells in blue, systemic *Akt1* deletion in  
814 salmon, and systemic *Akt2* deletion in green.

815

816 **Supplementary Figure 8:** Immunoblot showing that total Akt expression (pan-Akt) in  
817 neutrophils isolated from control (WT) and systemically deleted Akt1 or Akt2 tumor-  
818 bearing mice.

819

820

821

Chen et al.

## 822 **Uncategorized References**

- 823 1 Ciriello, G. *et al.* Comprehensive Molecular Portraits of Invasive Lobular Breast  
824 Cancer. *Cell* **163**, 506-519, doi:10.1016/j.cell.2015.09.033 (2015).
- 825 2 Irie, H. Y. *et al.* Distinct roles of Akt1 and Akt2 in regulating cell migration and  
826 epithelial-mesenchymal transition. *J Cell Biol* **171**, 1023-1034 (2005).
- 827 3 Dillon, R. L. *et al.* Akt1 and akt2 play distinct roles in the initiation and metastatic  
828 phases of mammary tumor progression. *Cancer Res* **69**, 5057-5064,  
829 doi:10.1158/0008-5472.CAN-08-4287 (2009).
- 830 4 Hutchinson, J. N., Jin, J., Cardiff, R. D., Woodgett, J. R. & Muller, W. J.  
831 Activation of Akt-1 (PKB-alpha) can accelerate ErbB-2-mediated mammary  
832 tumorigenesis but suppresses tumor invasion. *Cancer Res* **64**, 3171-3178 (2004).
- 833 5 Maroulakou, I. G., Oemler, W., Naber, S. P. & Tschlis, P. N. Akt1 ablation  
834 inhibits, whereas Akt2 ablation accelerates, the development of mammary  
835 adenocarcinomas in mouse mammary tumor virus (MMTV)-ErbB2/neu and  
836 MMTV-polyoma middle T transgenic mice. *Cancer Res* **67**, 167-177,  
837 doi:67/1/167 [pii]  
838 10.1158/0008-5472.CAN-06-3782 (2007).
- 839 6 Ju, X. *et al.* Akt1 governs breast cancer progression in vivo. *Proc Natl Acad Sci U*  
840 *S A* **104**, 7438-7443 (2007).
- 841 7 Ventura, A. *et al.* Restoration of p53 function leads to tumour regression in vivo.  
842 *Nature* **445**, 661-665 (2007).
- 843 8 Muller, W. J., Sinn, E., Pattengale, P. K., Wallace, R. & Leder, P. Single-step  
844 induction of mammary adenocarcinoma in transgenic mice bearing the activated  
845 c-neu oncogene. *Cell* **54**, 105-115, doi:0092-8674(88)90184-5 [pii] (1988).
- 846 9 Wang, Q. *et al.* Spontaneous Hepatocellular Carcinoma after the Combined  
847 Deletion of Akt Isoforms. *Cancer Cell* **29**, 523-535,  
848 doi:10.1016/j.ccell.2016.02.008 (2016).
- 849 10 Lin, E. Y. *et al.* Progression to malignancy in the polyoma middle T oncoprotein  
850 mouse breast cancer model provides a reliable model for human diseases. *Am J*  
851 *Pathol* **163**, 2113-2126, doi:10.1016/S0002-9440(10)63568-7 (2003).
- 852 11 Macosko, E. Z. *et al.* Highly Parallel Genome-wide Expression Profiling of  
853 Individual Cells Using Nanoliter Droplets. *Cell* **161**, 1202-1214,  
854 doi:10.1016/j.cell.2015.05.002 (2015).
- 855 12 Cheung, K. J. *et al.* Polyclonal breast cancer metastases arise from collective  
856 dissemination of keratin 14-expressing tumor cell clusters. *Proc Natl Acad Sci U*  
857 *S A* **113**, E854-863, doi:10.1073/pnas.1508541113 (2016).
- 858 13 Padmanaban, V. *et al.* E-cadherin is required for metastasis in multiple models of  
859 breast cancer. *Nature* **573**, 439-444, doi:10.1038/s41586-019-1526-3 (2019).
- 860 14 Mouchemore, K. A., Anderson, R. L. & Hamilton, J. A. Neutrophils, G-CSF and  
861 their contribution to breast cancer metastasis. *FEBS J* **285**, 665-679,  
862 doi:10.1111/febs.14206 (2018).
- 863 15 Wculek, S. K. & Malanchi, I. Neutrophils support lung colonization of metastasis-  
864 initiating breast cancer cells. *Nature* **528**, 413-417, doi:10.1038/nature16140  
865 (2015).

Chen et al.

- 866 16 Ethier, J. L., Desautels, D., Templeton, A., Shah, P. S. & Amir, E. Prognostic role  
867 of neutrophil-to-lymphocyte ratio in breast cancer: a systematic review and meta-  
868 analysis. *Breast Cancer Res* **19**, 2, doi:10.1186/s13058-016-0794-1 (2017).
- 869 17 Passegue, E., Wagner, E. F. & Weissman, I. L. JunB deficiency leads to a  
870 myeloproliferative disorder arising from hematopoietic stem cells. *Cell* **119**, 431-  
871 443, doi:10.1016/j.cell.2004.10.010 (2004).
- 872 18 Robichaud, N. *et al.* Translational control in the tumor microenvironment  
873 promotes lung metastasis: Phosphorylation of eIF4E in neutrophils. *Proc Natl*  
874 *Acad Sci U S A* **115**, E2202-E2209, doi:10.1073/pnas.1717439115 (2018).
- 875 19 Gingras, A. C., Kennedy, S. G., O'Leary, M. A., Sonenberg, N. & Hay, N. 4E-  
876 BP1, a repressor of mRNA translation, is phosphorylated and inactivated by the  
877 Akt(PKB) signaling pathway. *Genes Dev* **12**, 502-513 (1998).
- 878 20 Maurer, U., Charvet, C., Wagman, A. S., Dejardin, E. & Green, D. R. Glycogen  
879 synthase kinase-3 regulates mitochondrial outer membrane permeabilization and  
880 apoptosis by destabilization of MCL-1. *Mol Cell* **21**, 749-760 (2006).
- 881 21 Dzhagalov, I., St John, A. & He, Y. W. The antiapoptotic protein Mcl-1 is  
882 essential for the survival of neutrophils but not macrophages. *Blood* **109**, 1620-  
883 1626, doi:10.1182/blood-2006-03-013771 (2007).
- 884 22 Tahara, A. *et al.* Effects of SGLT2 selective inhibitor ipragliflozin on  
885 hyperglycemia, hyperlipidemia, hepatic steatosis, oxidative stress, inflammation,  
886 and obesity in type 2 diabetic mice. *Eur J Pharmacol* **715**, 246-255,  
887 doi:10.1016/j.ejphar.2013.05.014 (2013).
- 888 23 Huh, S. J., Liang, S., Sharma, A., Dong, C. & Robertson, G. P. Transiently  
889 entrapped circulating tumor cells interact with neutrophils to facilitate lung  
890 metastasis development. *Cancer Res* **70**, 6071-6082, doi:10.1158/0008-  
891 5472.CAN-09-4442 (2010).
- 892 24 Szczerba, B. M. *et al.* Neutrophils escort circulating tumour cells to enable cell  
893 cycle progression. *Nature* **566**, 553-557, doi:10.1038/s41586-019-0915-y (2019).
- 894 25 Park, J. *et al.* Cancer cells induce metastasis-supporting neutrophil extracellular  
895 DNA traps. *Sci Transl Med* **8**, 361ra138, doi:10.1126/scitranslmed.aag1711  
896 (2016).
- 897 26 Patel, S. *et al.* Unique pattern of neutrophil migration and function during tumor  
898 progression. *Nat Immunol* **19**, 1236-1247, doi:10.1038/s41590-018-0229-5  
899 (2018).
- 900 27 Mellouli, F. *et al.* Successful treatment of *Fusarium solani* ecthyma gangrenosum  
901 in a patient affected by leukocyte adhesion deficiency type 1 with granulocytes  
902 transfusions. *BMC Dermatol* **10**, 10, doi:10.1186/1471-5945-10-10 (2010).
- 903 28 Chen, J., Tang, H., Hay, N., Xu, J. & Ye, R. D. Akt isoforms differentially  
904 regulate neutrophil functions. *Blood* **115**, 4237-4246, doi:10.1182/blood-2009-11-  
905 255323 (2010).
- 906 29 Coffelt, S. B., Wellenstein, M. D. & de Visser, K. E. Neutrophils in cancer:  
907 neutral no more. *Nat Rev Cancer* **16**, 431-446, doi:10.1038/nrc.2016.52 (2016).
- 908 30 Hopkins, B. D. *et al.* Suppression of insulin feedback enhances the efficacy of  
909 PI3K inhibitors. *Nature* **560**, 499-503, doi:10.1038/s41586-018-0343-4 (2018).

Chen et al.

- 910 31 Yu, W. N. *et al.* Systemic Akt1 Deletion after Tumor Onset in p53(-/-) Mice  
911 Increases Lifespan and Regresses Thymic Lymphoma Emulating p53 Restoration.  
912 *Cell Rep* **12**, 610-621, doi:10.1016/j.celrep.2015.06.057 (2015).
- 913 32 Watanabe, Y. *et al.* Beneficial effects of canagliflozin in combination with  
914 pioglitazone on insulin sensitivity in rodent models of obese type 2 diabetes.  
915 *PLoS One* **10**, e0116851, doi:10.1371/journal.pone.0116851 (2015).
- 916 33 Naznin, F. *et al.* Canagliflozin, a sodium glucose cotransporter 2 inhibitor,  
917 attenuates obesity-induced inflammation in the nodose ganglion, hypothalamus,  
918 and skeletal muscle of mice. *Eur J Pharmacol* **794**, 37-44,  
919 doi:10.1016/j.ejphar.2016.11.028 (2017).
- 920 34 Thrailkill, K. M. *et al.* SGLT2 inhibitor therapy improves blood glucose but does  
921 not prevent diabetic bone disease in diabetic DBA/2J male mice. *Bone* **82**, 101-  
922 107, doi:10.1016/j.bone.2015.07.025 (2016).
- 923 35 Butler, A., Hoffman, P., Smibert, P., Papalexi, E. & Satija, R. Integrating single-  
924 cell transcriptomic data across different conditions, technologies, and species. *Nat*  
925 *Biotechnol* **36**, 411-420, doi:10.1038/nbt.4096 (2018).
- 926

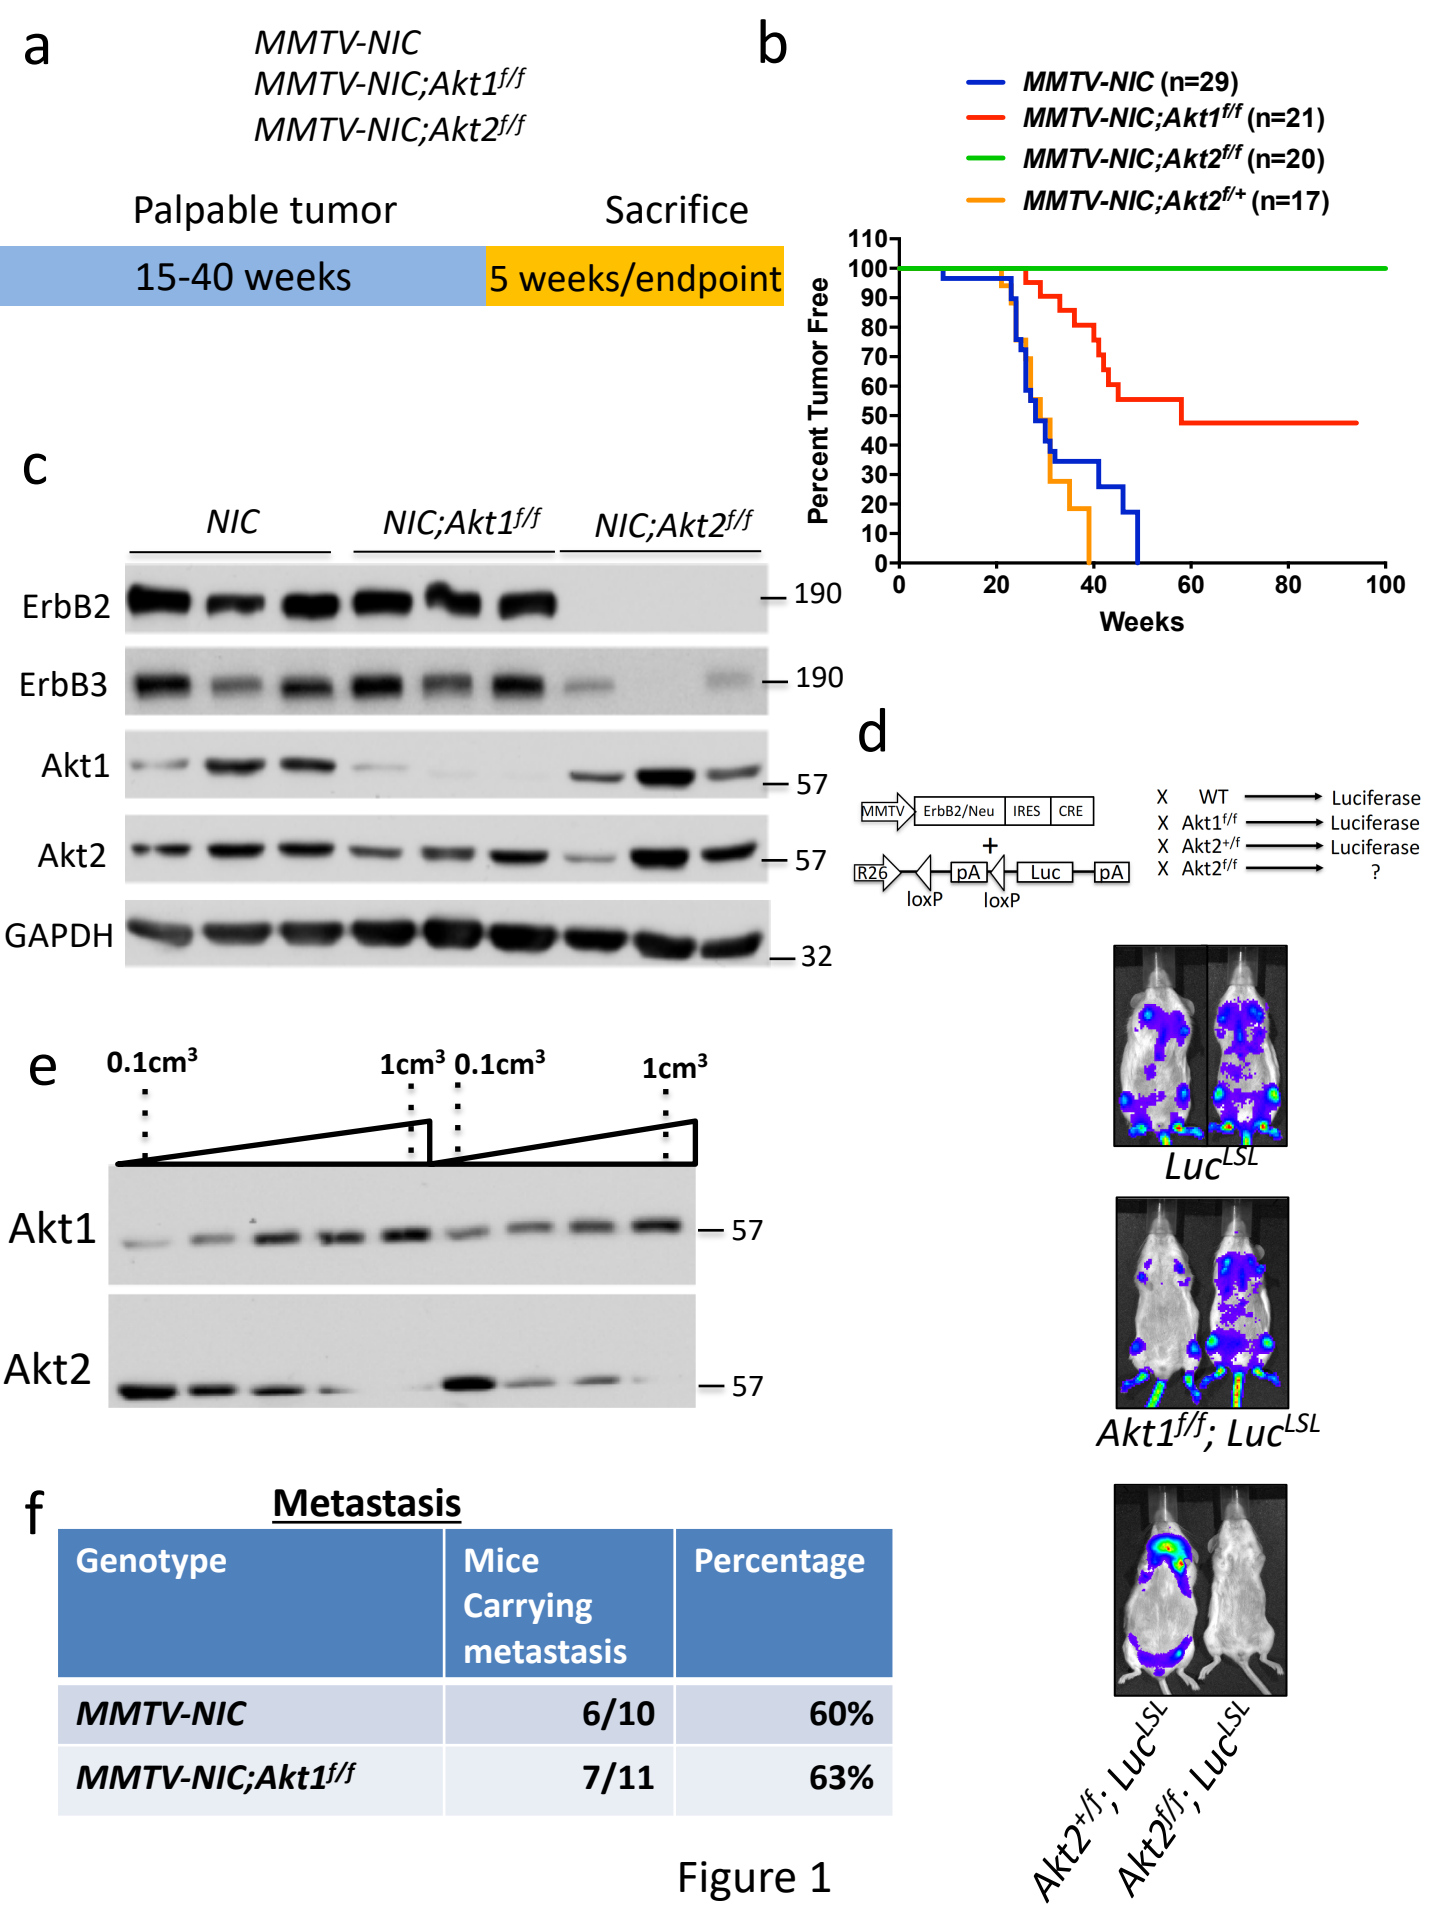



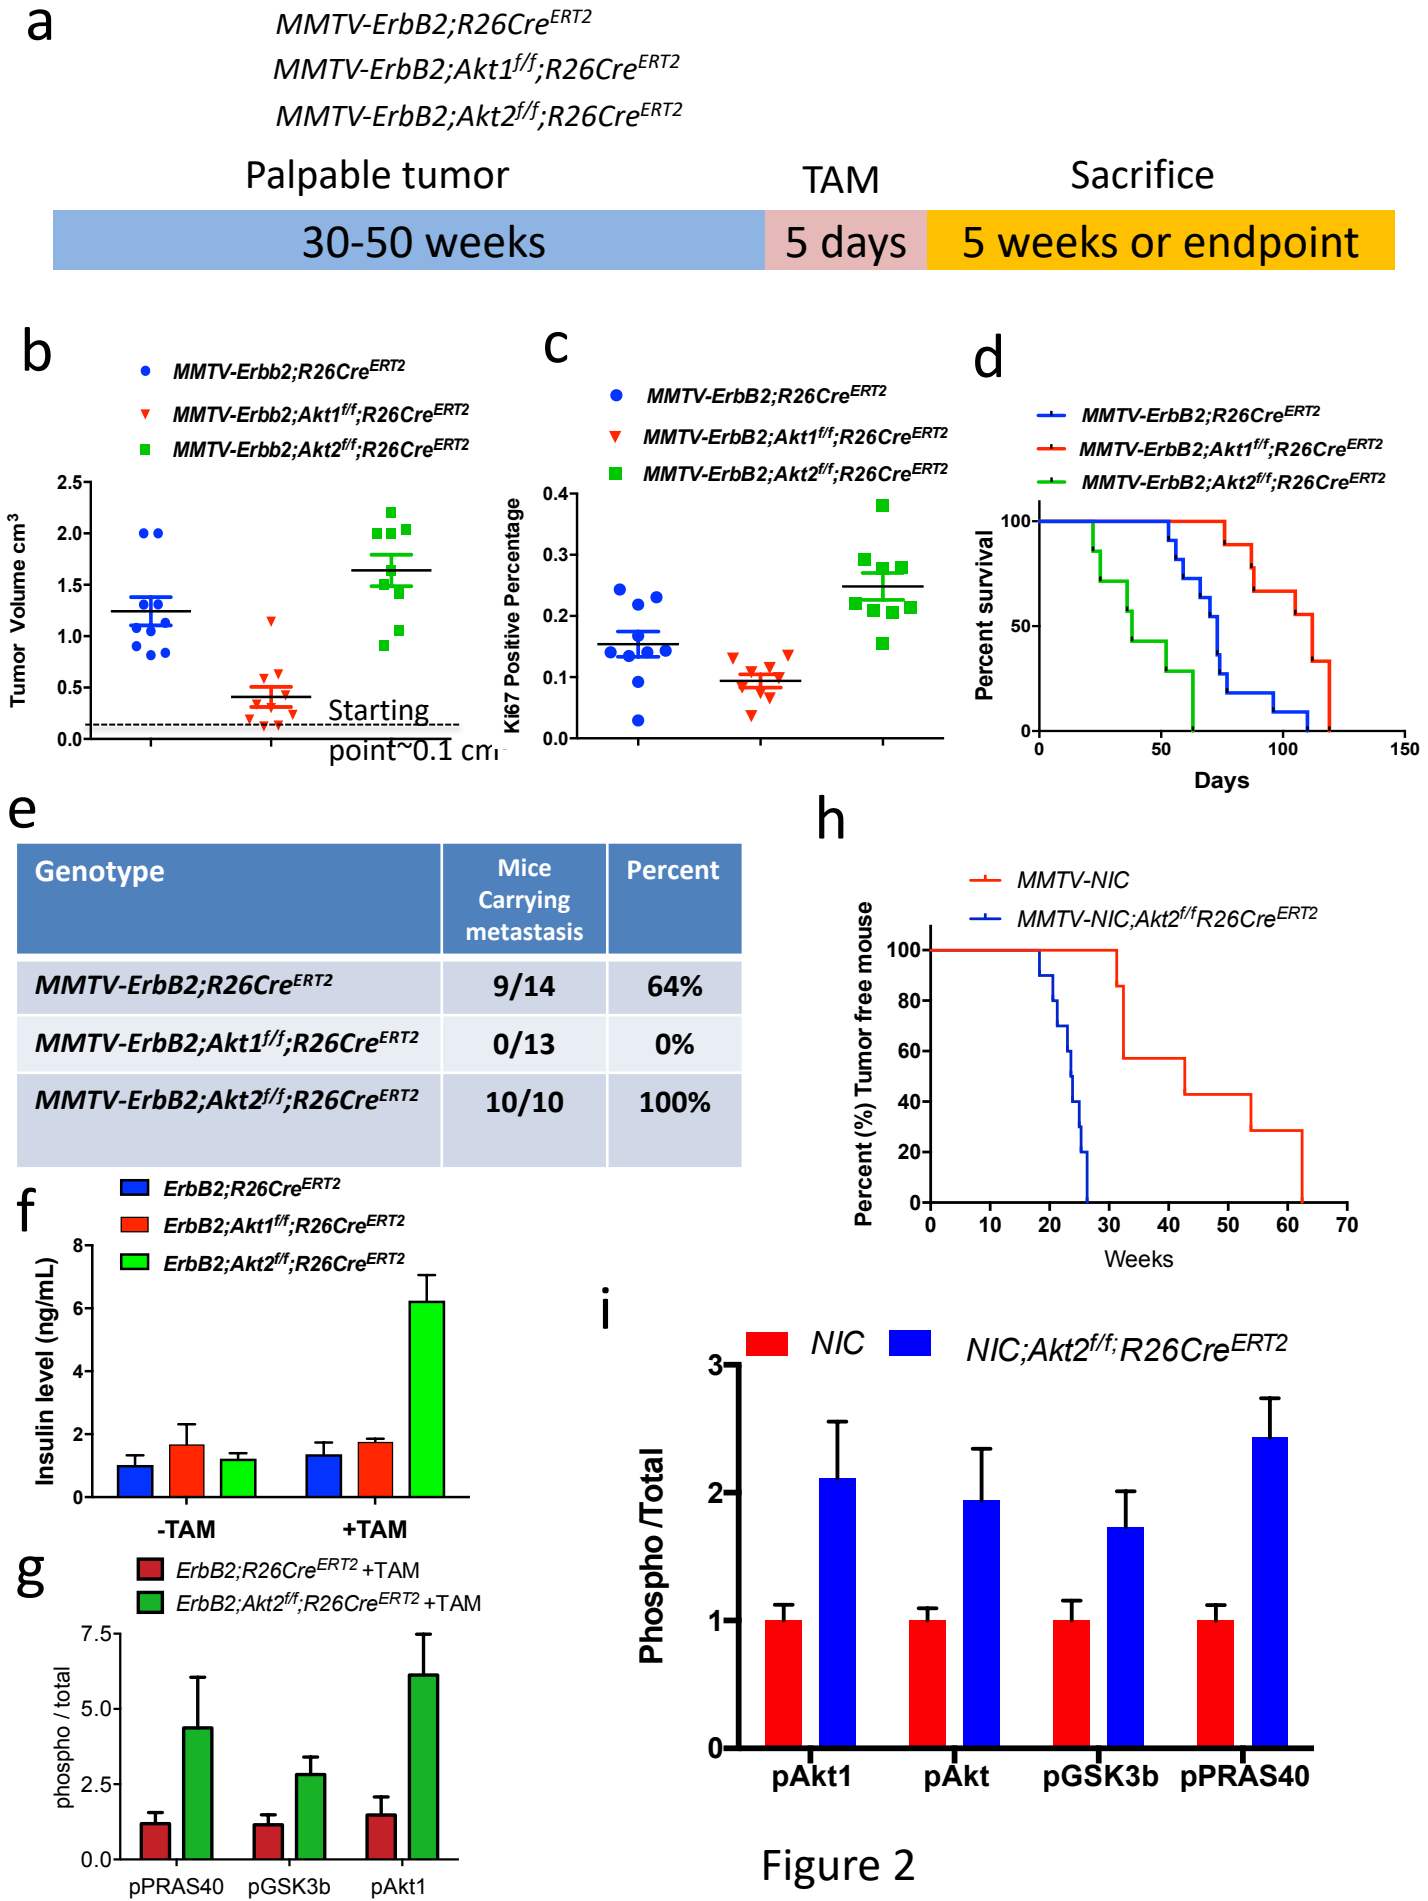

Figure 2

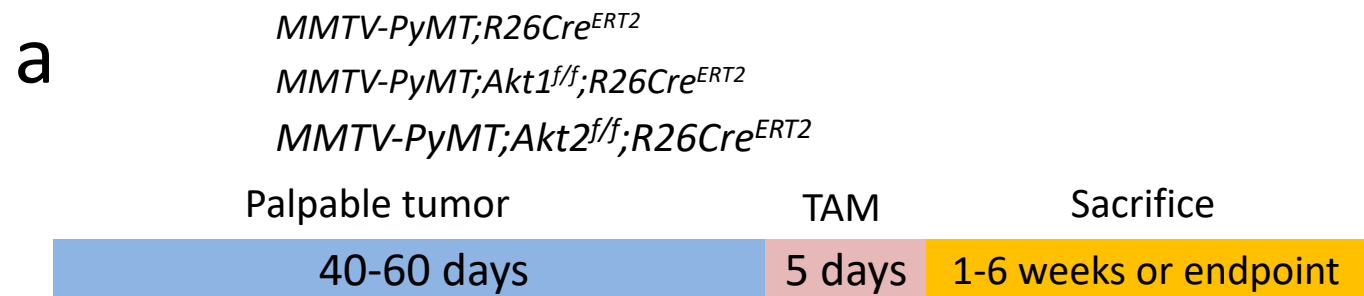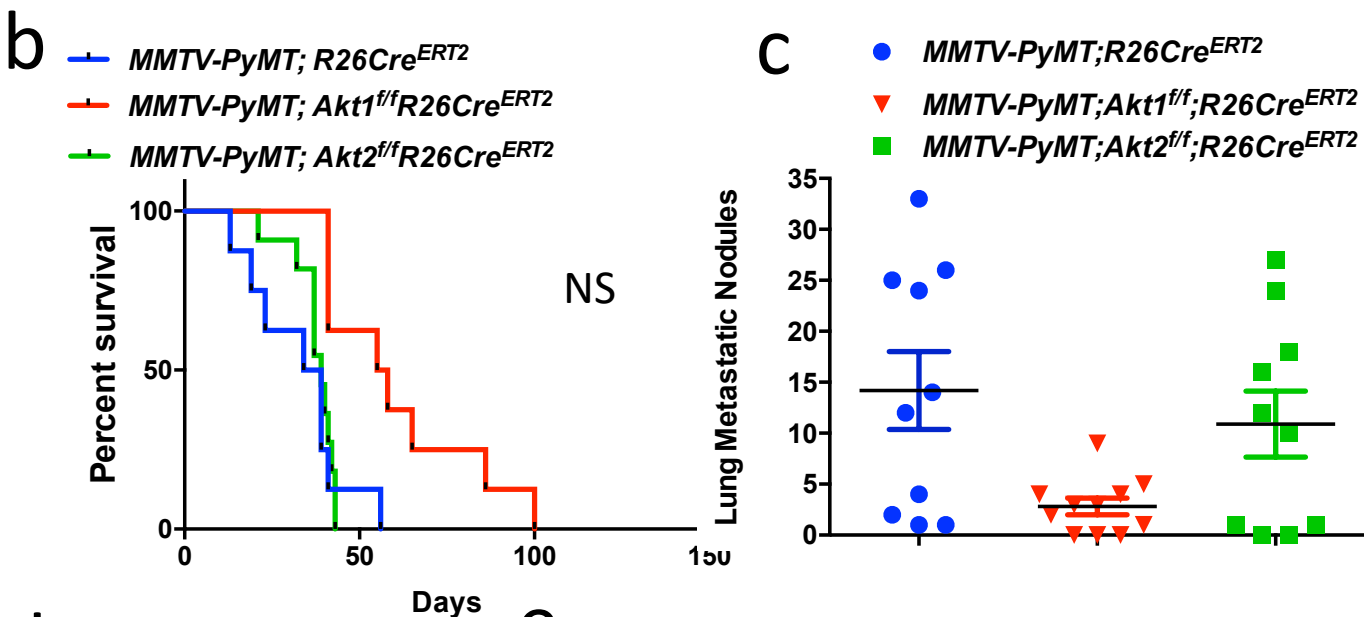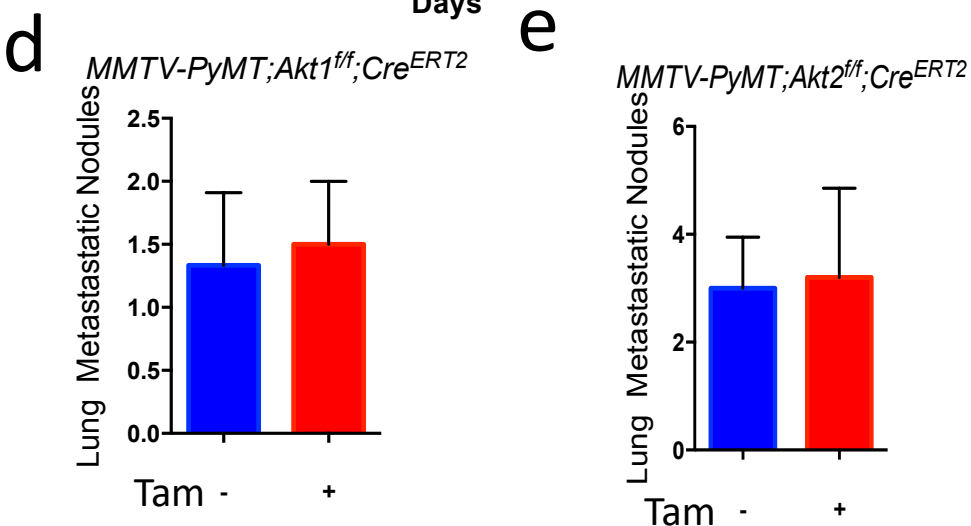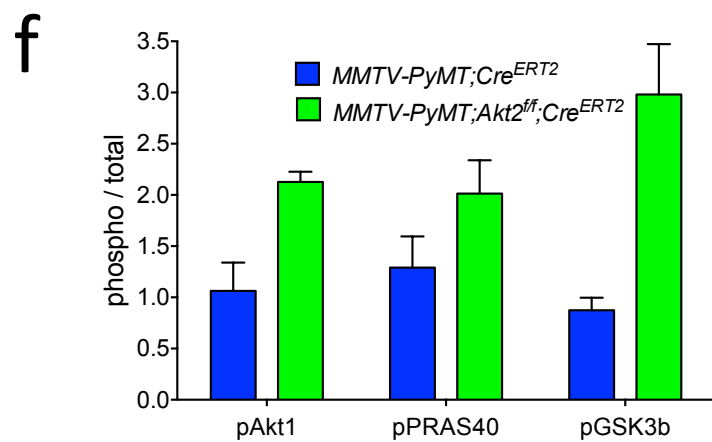

Figure 3

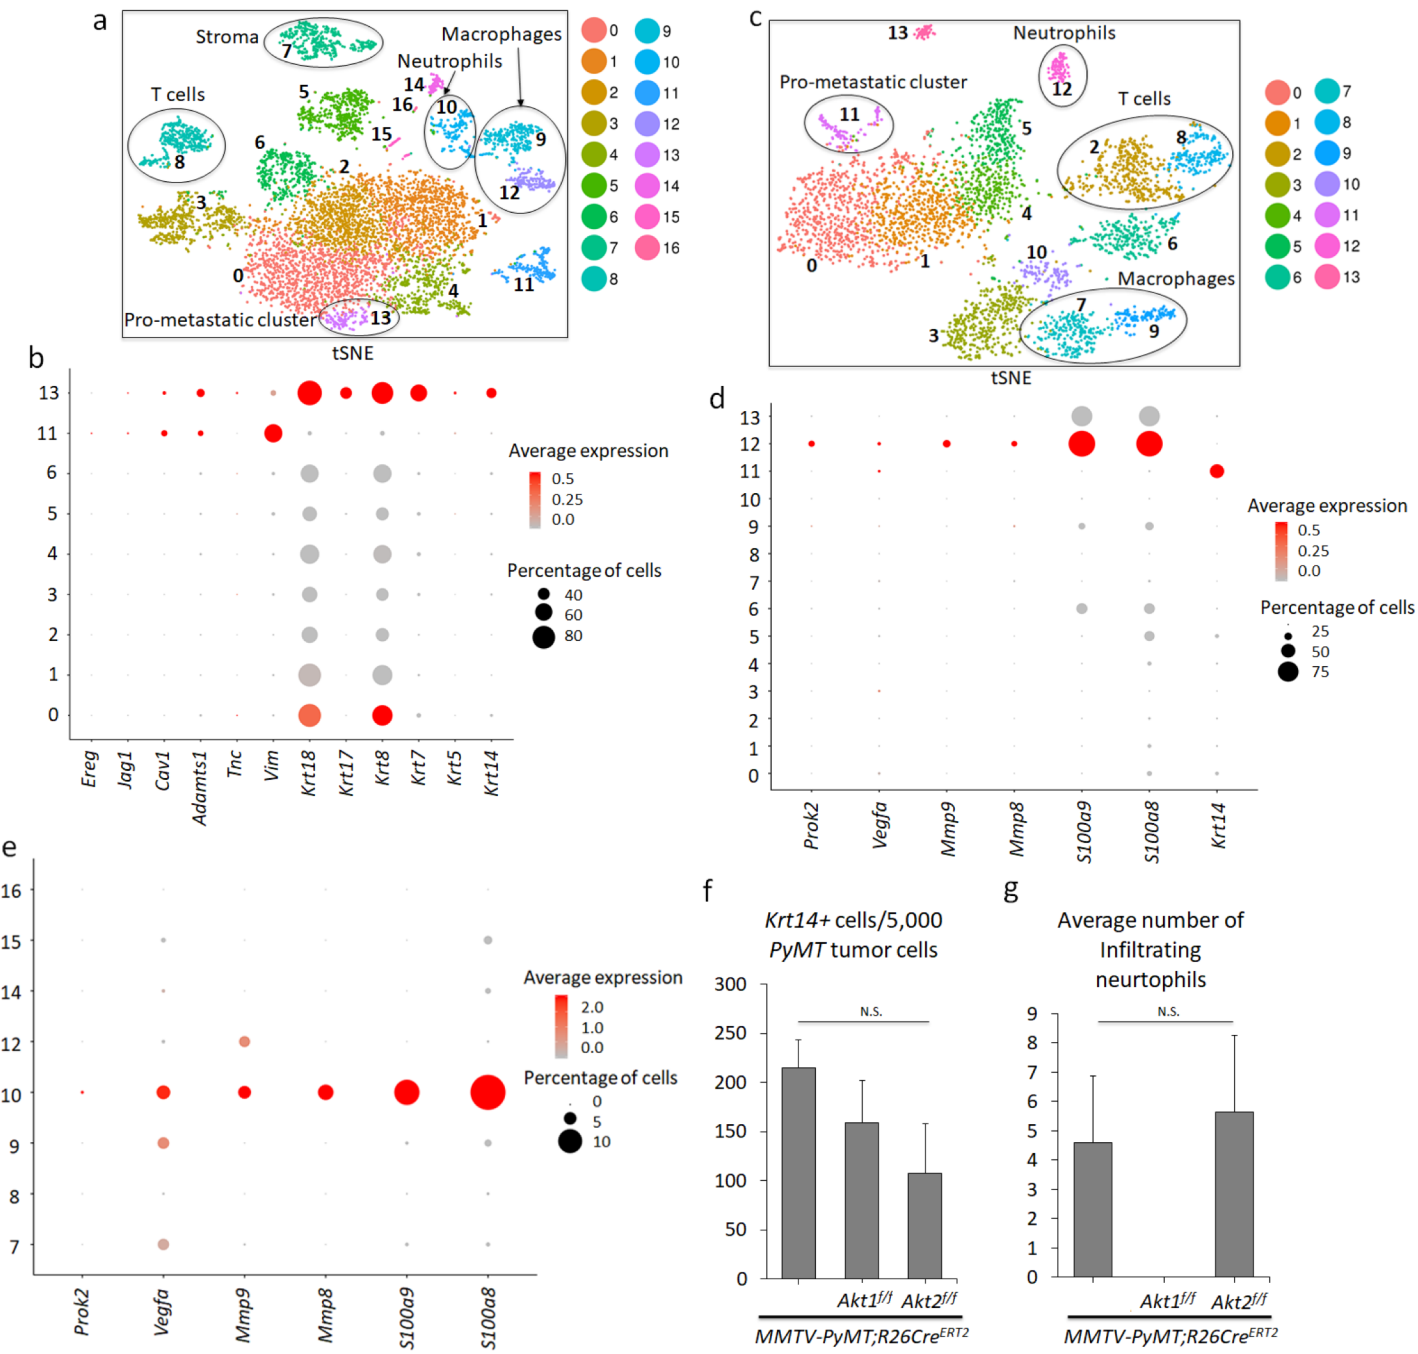

Figure 4

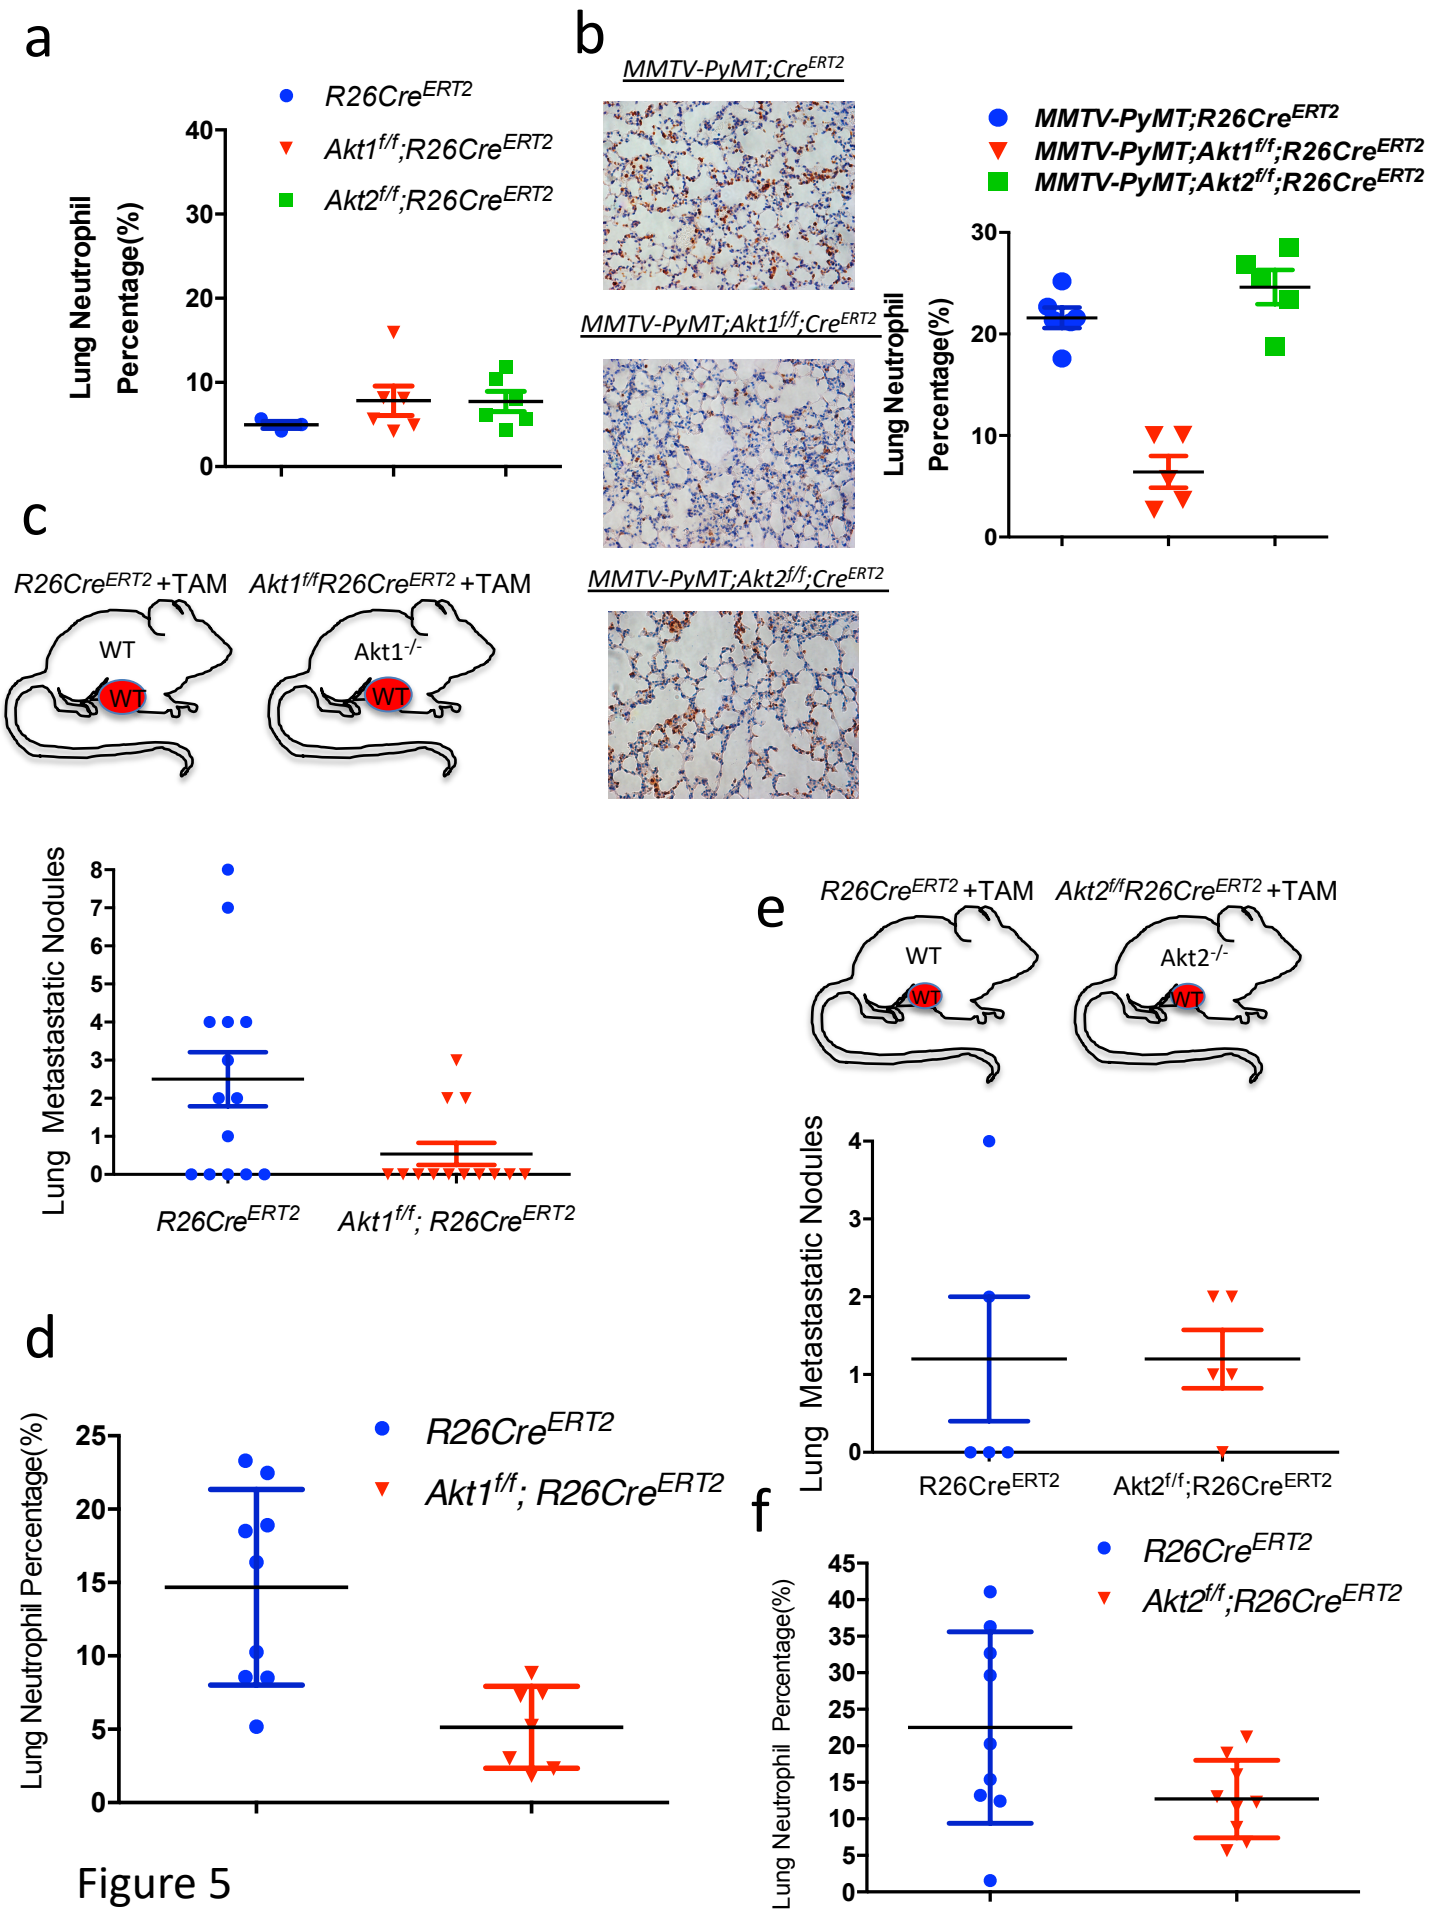

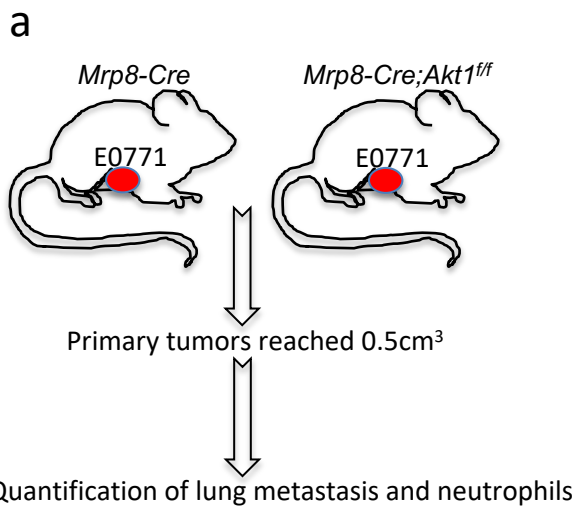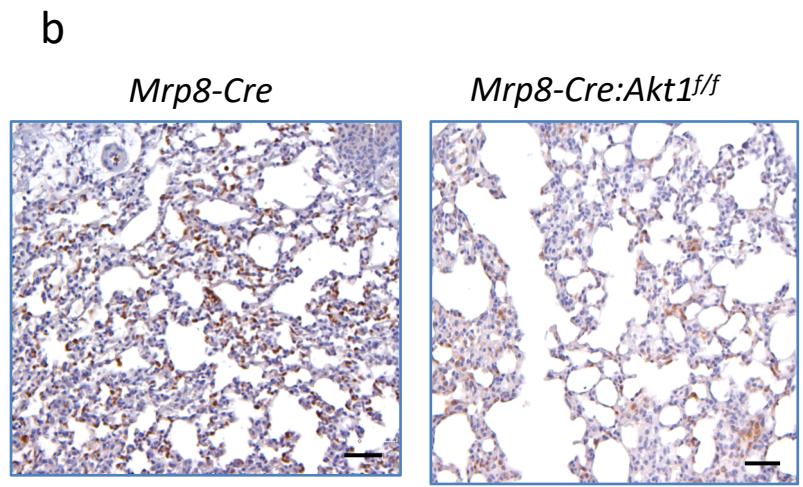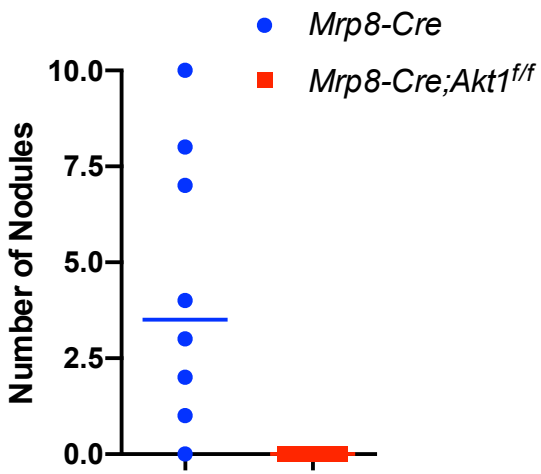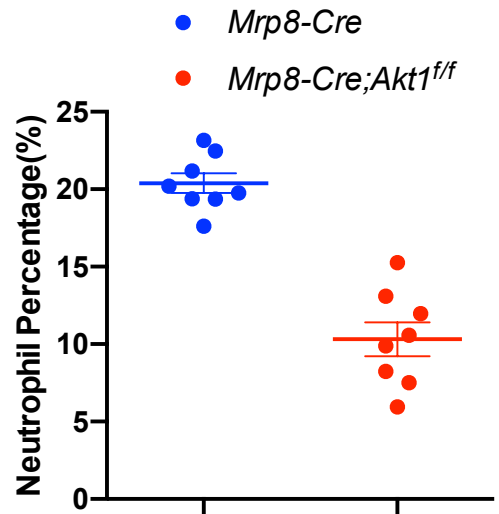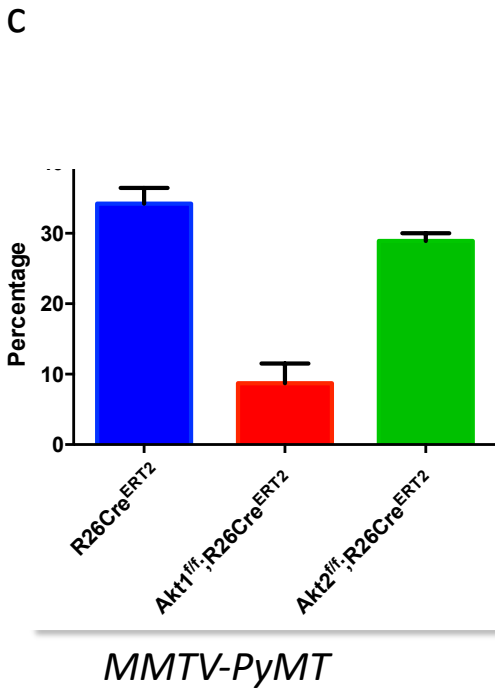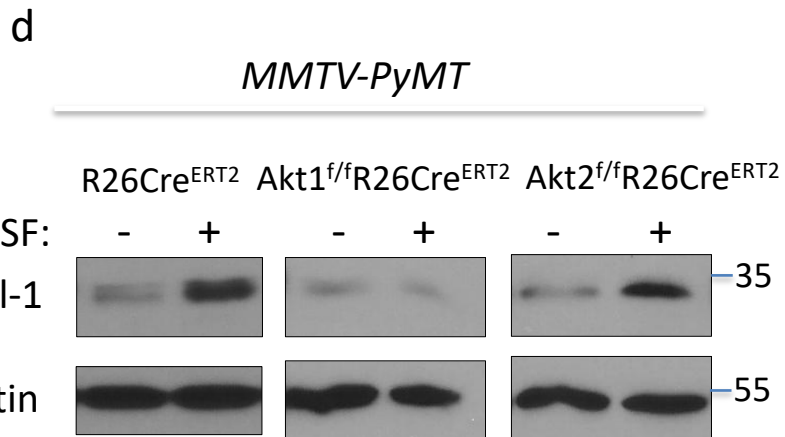

Figure 6

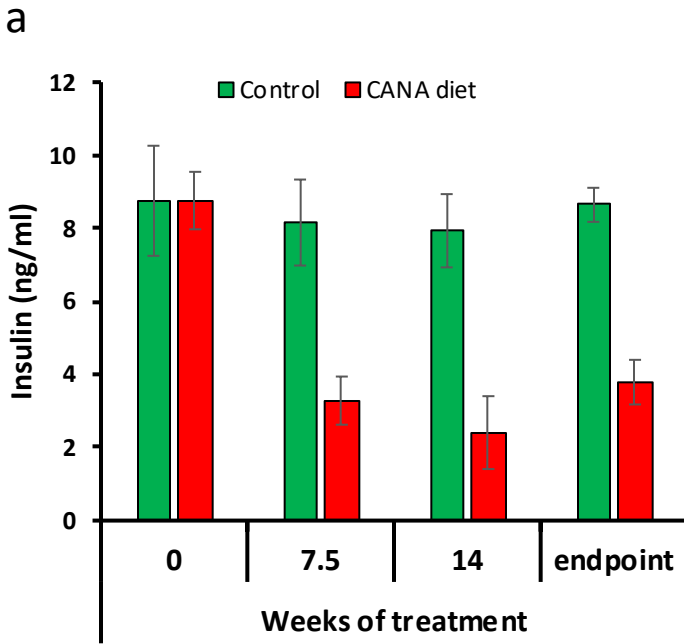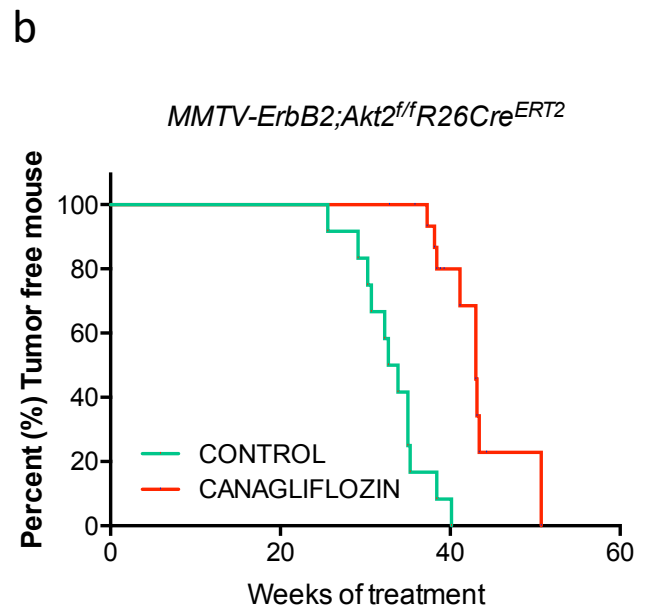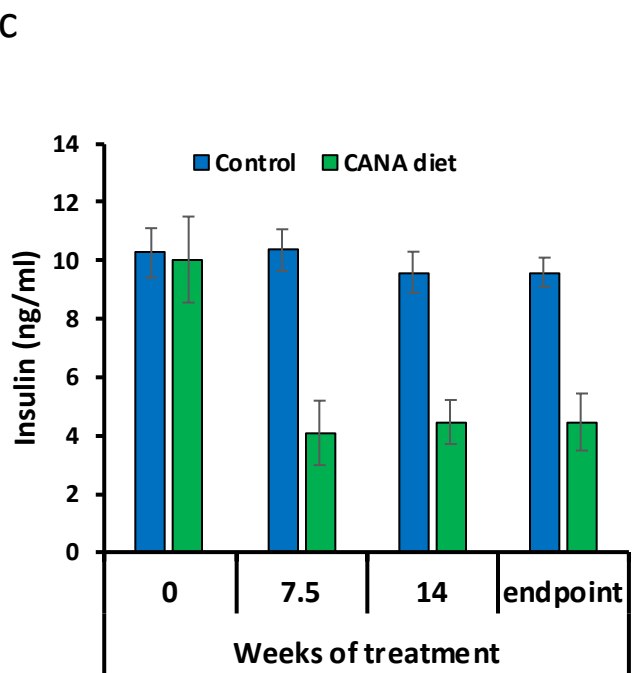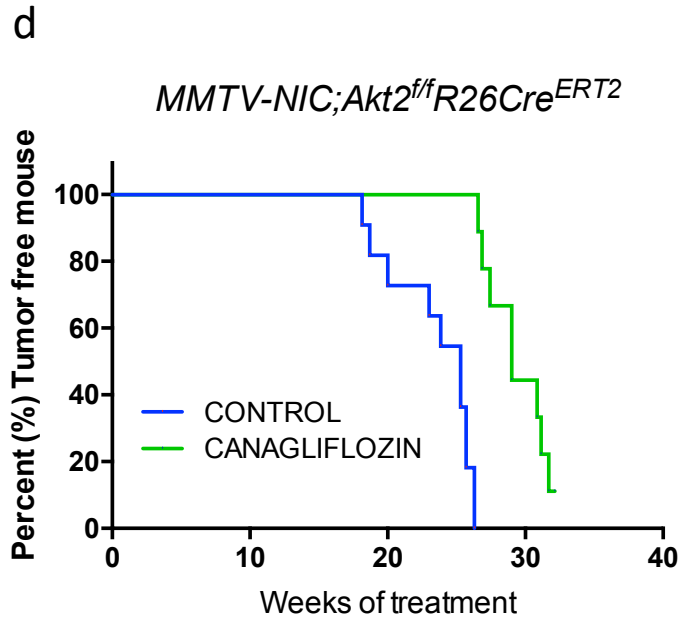

Figure 7

**a**

## Cell Autonomous Effect

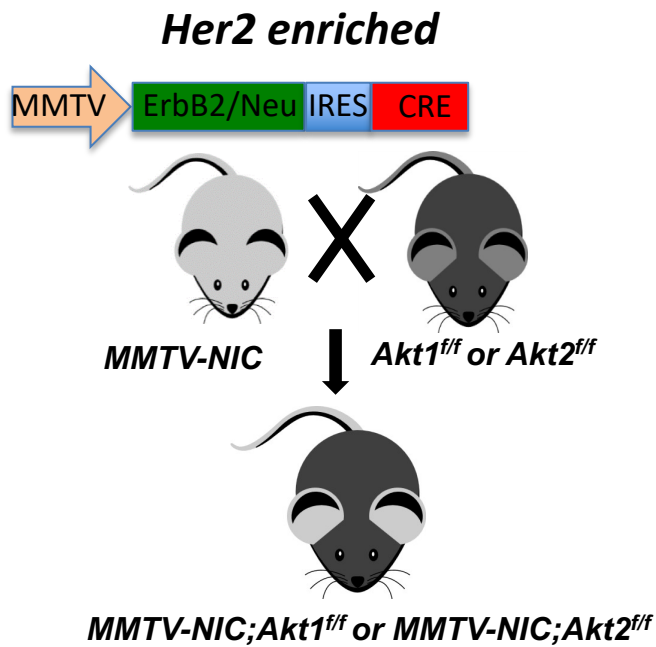**b**

## Systemic Effect to Emulate Drug Therapy

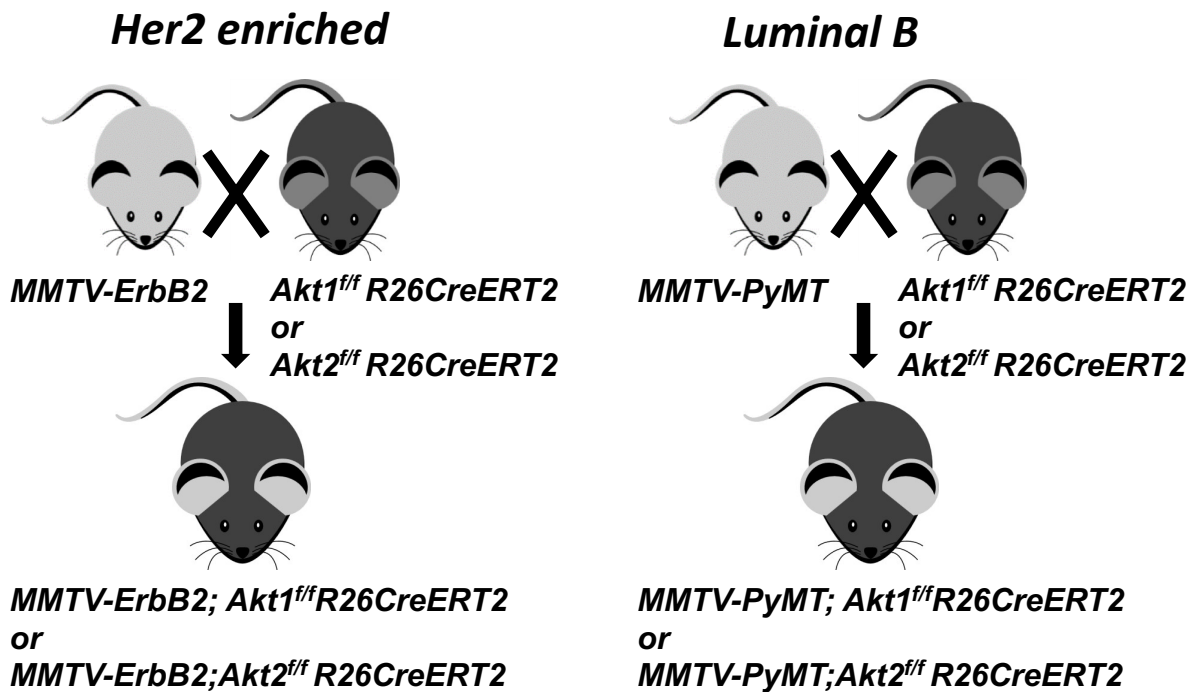

**Supplementary Figure 1: Breeding schemes.** **a.** Breeding to generate a high Her2 mouse model with mammary gland-specific deletion of Akt1 or Akt2 to determine the cell autonomous effect. **b.** Breeding to determine the systemic effect of Akt1 or Akt2 deletion in high Her2 (left panel) and luminal B (right panel) mouse models.



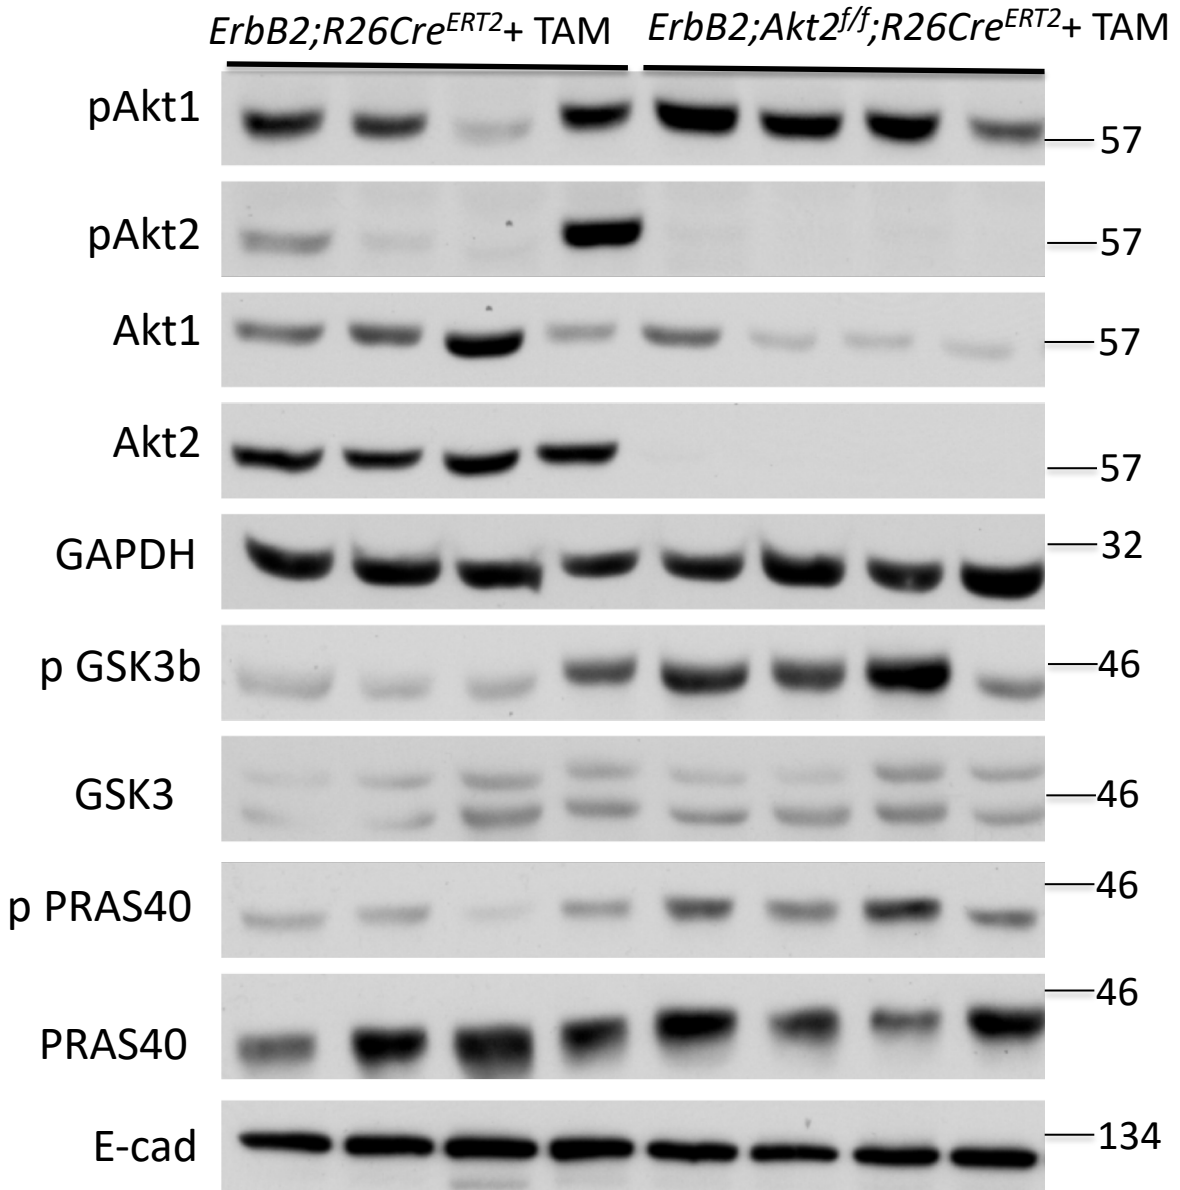

**Supplementary Figure 2a:** Representative immunoblot showing the phosphorylation of Akt1 (pSer473), GSK3b, and PRAS40 in mammary gland tumors derived from control *MMTV-ErbB2;R26Cre<sup>ERT2</sup>* or *MMTV-ErbB2;Akt2<sup>ff</sup>;R26Cre<sup>ERT2</sup>* mice after the systemic deletion of Akt2. Protein extracts from individual tumors in four different mice were used.

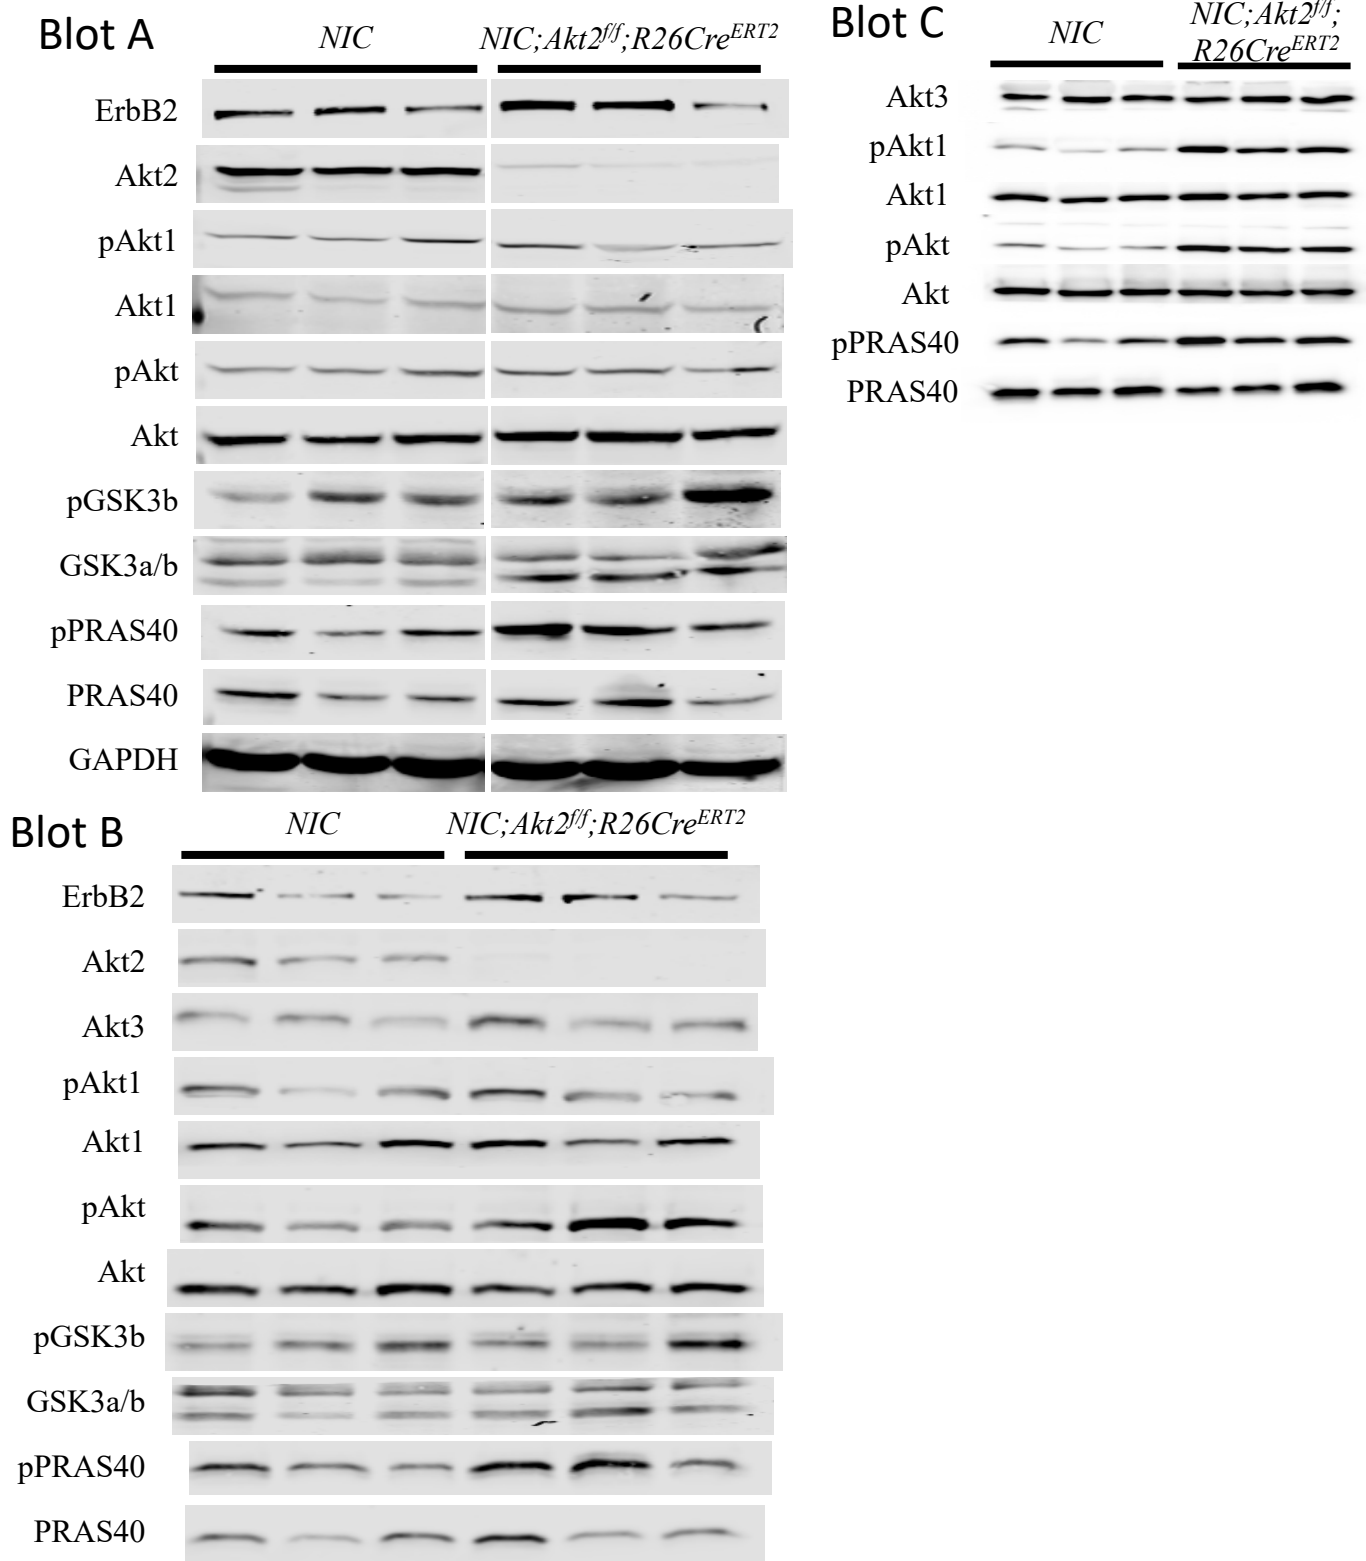

**Supplementary Figure 2b:** Representative immunoblots showing expression of Akt1, Akt2, Akt3, and total Akt, GSK3b, PRAS40, phosphorylation of Akt1 (pSer473), phosphorylation of pan-Akt (pSer473), phosphorylation of GSK3b, and PRAS40 in mammary gland tumors derived from control *MMTV-NIC* or *MMTV-NIC;Akt2<sup>f/f</sup>;R26Cre<sup>ERT2</sup>* mice after the systemic deletion of Akt2. Protein extracts from individual tumors in nine different mice were used.

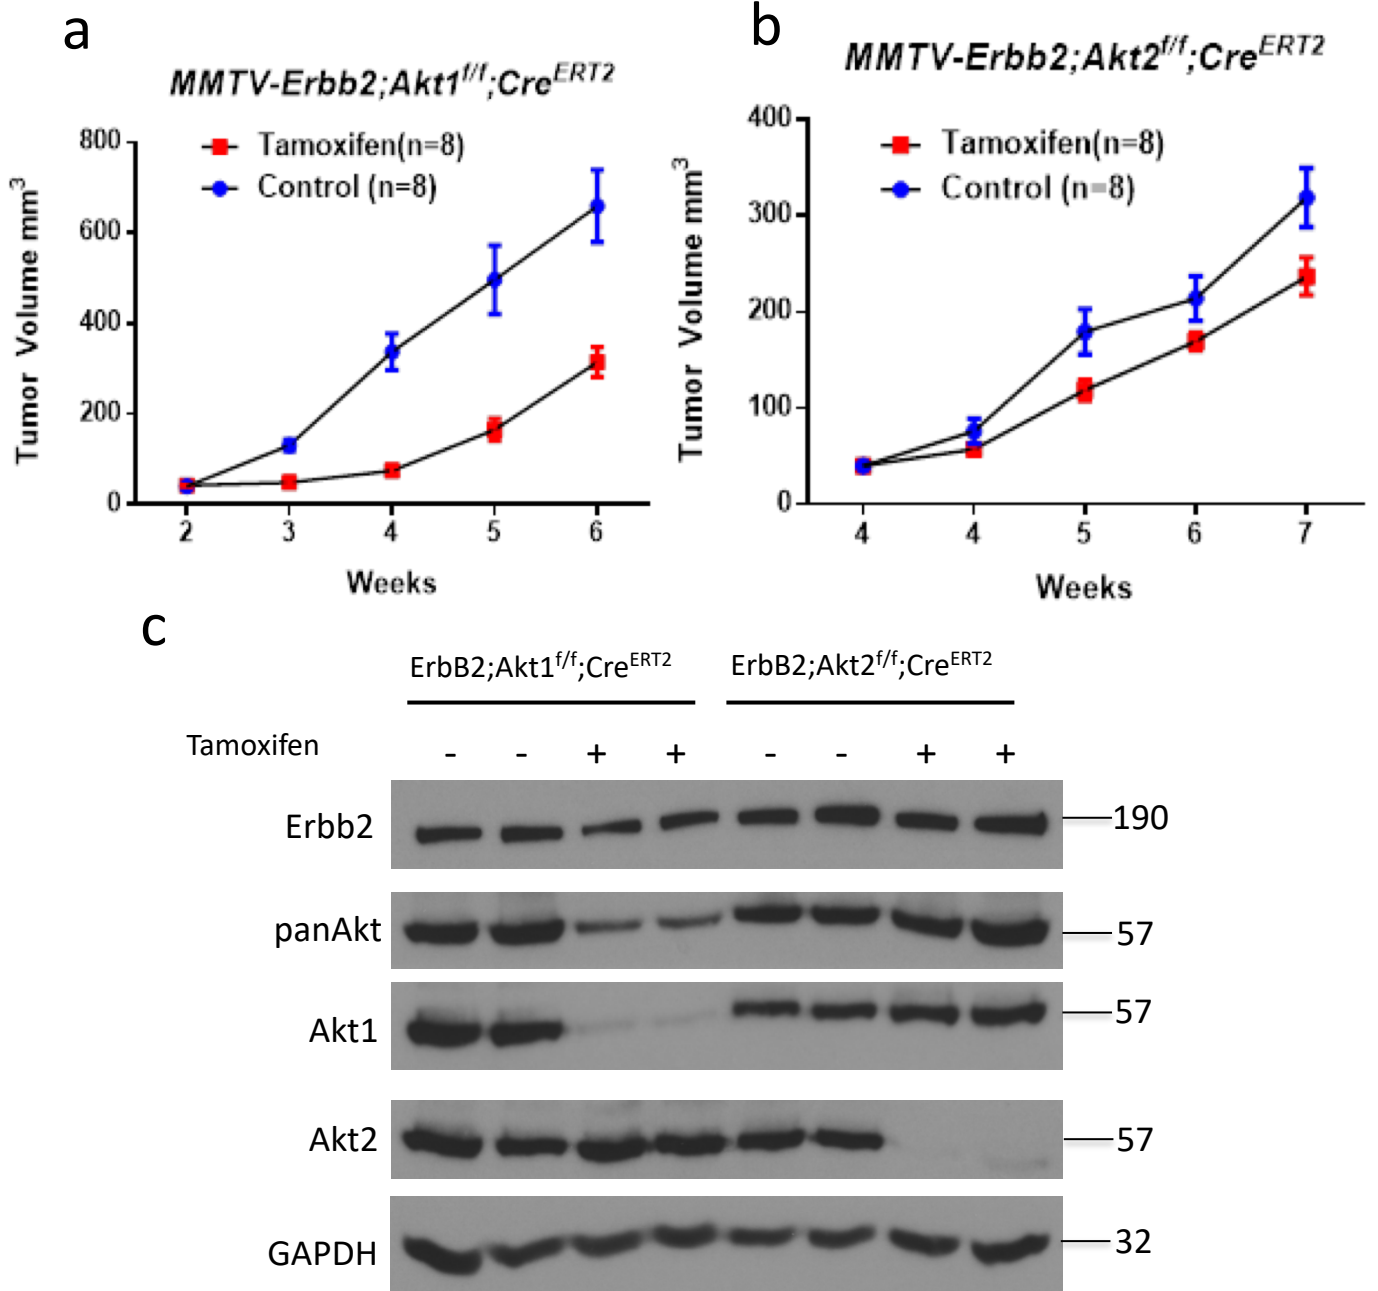

**Supplementary Figure 3: Cell autonomous deletion of Akt1 or Akt2 in orthotopically transplanted tumors in NOG mice.** **a.** Tumor growth curve of mammary tumor cells derived from *MMTV-ErbB2;Akt1<sup>fl/fl</sup>;R26RCre<sup>ERT2</sup>* mice and orthotopically implanted into the mammary fat pad of NOG mice. After palpation, the mice were either treated or not treated with tamoxifen to delete Akt1. Cell autonomous Akt1 deletion significantly impaired tumor growth (n=8, p<0.001). **b.** Tumor growth curve of mammary tumor cells derived from *MMTV-ErbB2;Akt2<sup>fl/fl</sup>;R26RCre<sup>ERT2</sup>* mice and orthotopically implanted into the mammary fat pad of NOG mice. After palpation, the mice were either treated or not treated with tamoxifen to delete Akt2. Cell autonomous Akt2 deletion significantly impaired tumor growth (n=8, p<0.001). **c.** Representative immunoblot showing the level of total Akt expression in orthotopic tumors after the deletion of Akt1 or Akt2.

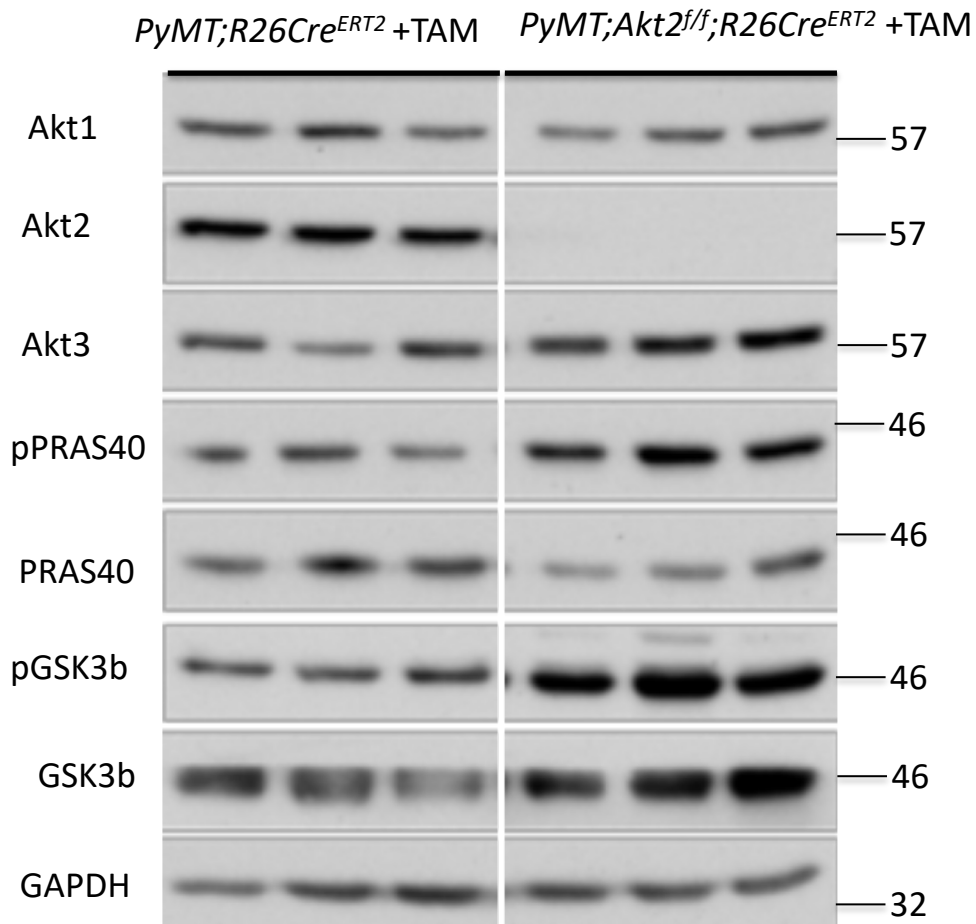

**Supplementary Figure 4:** Representative immunoblot showing the phosphorylation of GSK3b and PRAS40 in mammary gland tumors derived from control *MMTV-PyMT;R26Cre<sup>ERT2</sup>* mice or after the systemic deletion of Akt2. Extracts from individual tumors in three different mice were used.

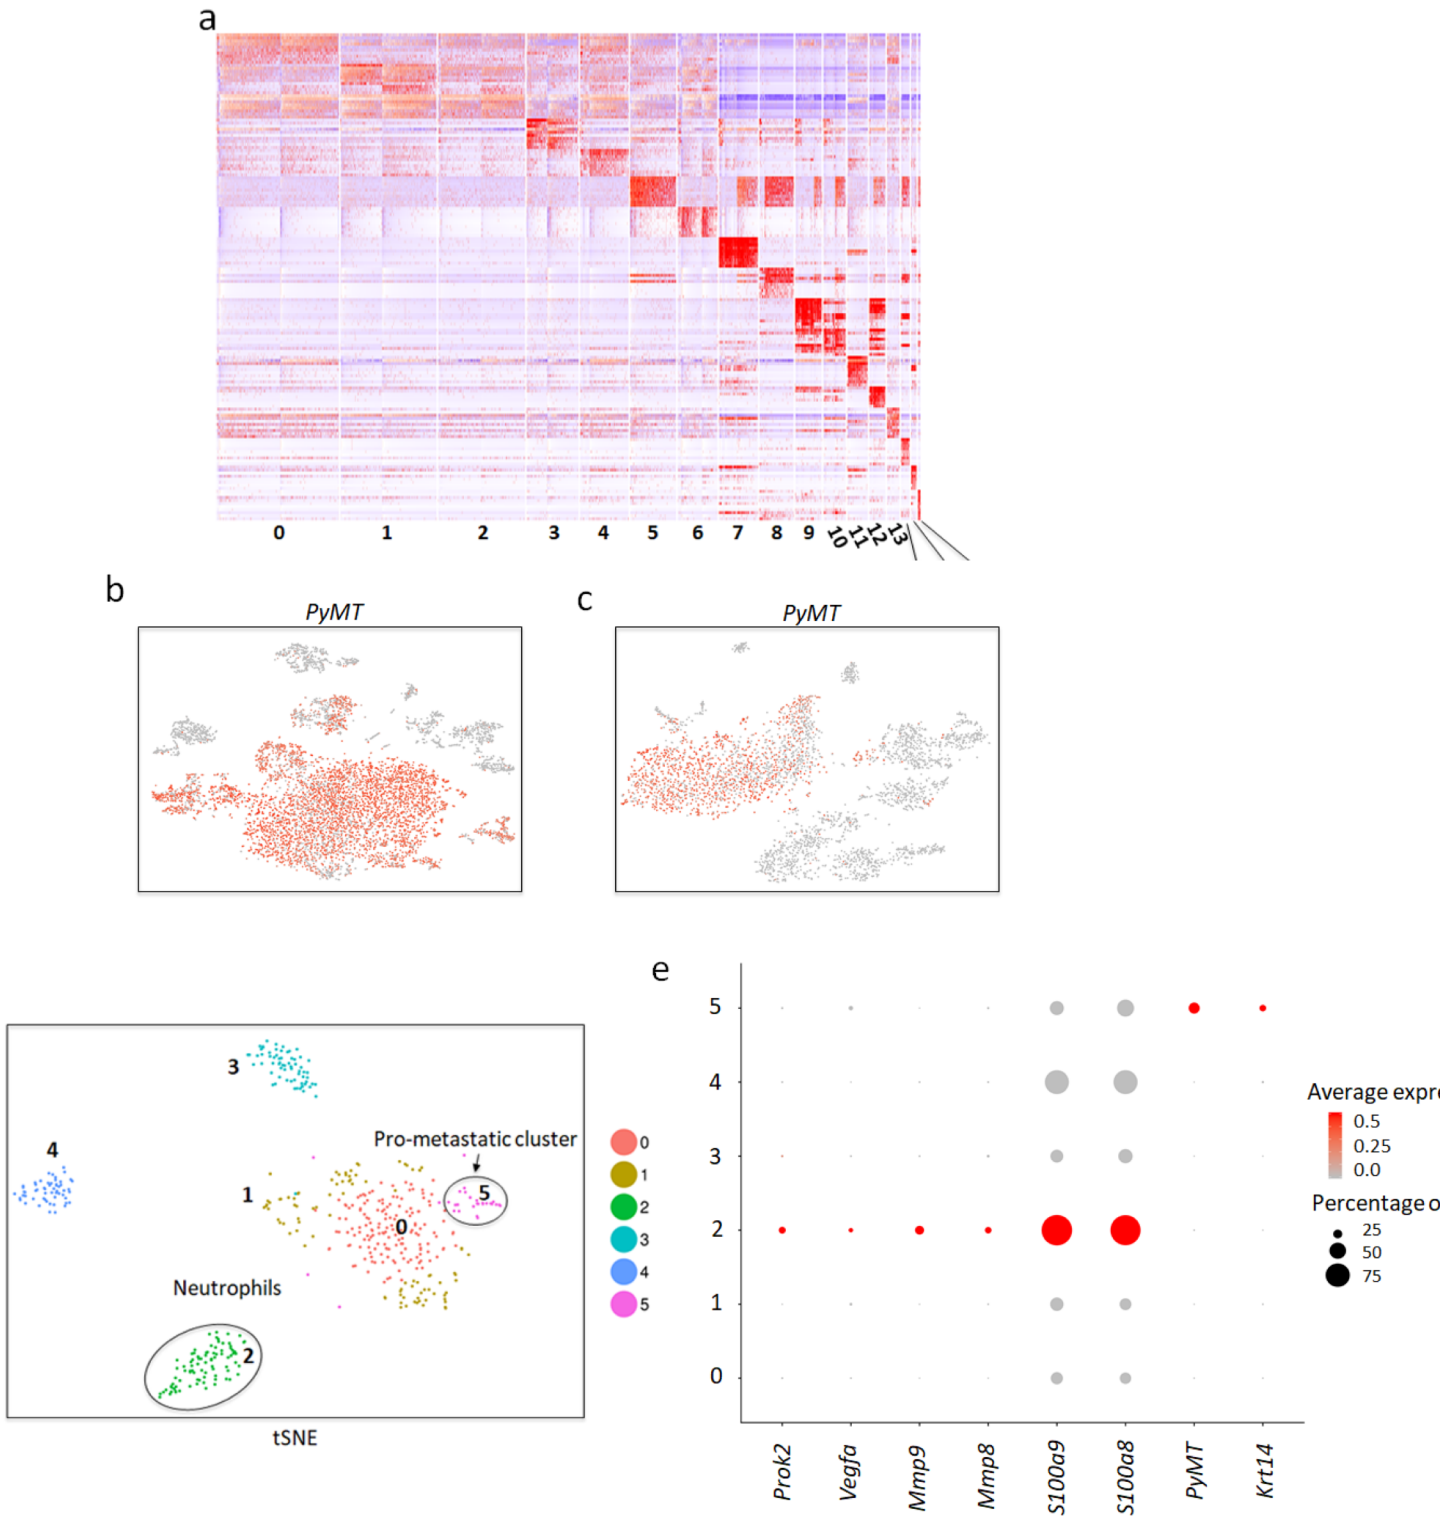

**Supplementary Figure 5:** **a.** Heatmap showing distinct markers in each cluster using scRNA-seq on the primary *MMTV-PyMT* breast tumor tissue. **b.** Feature plot showing the cells expressing *PyMT* in the primary breast tumor analysis. **c.** Feature plot showing the cells expressing *PyMT* in the metastatic lung tumor analysis. **d.** Analysis of lung micrometastatic lesions revealing prometastatic cluster 5. **e.** Dot plot showing the expression of *PyMT* and *Krt14* in cluster 5 only in the micrometastasis analysis.

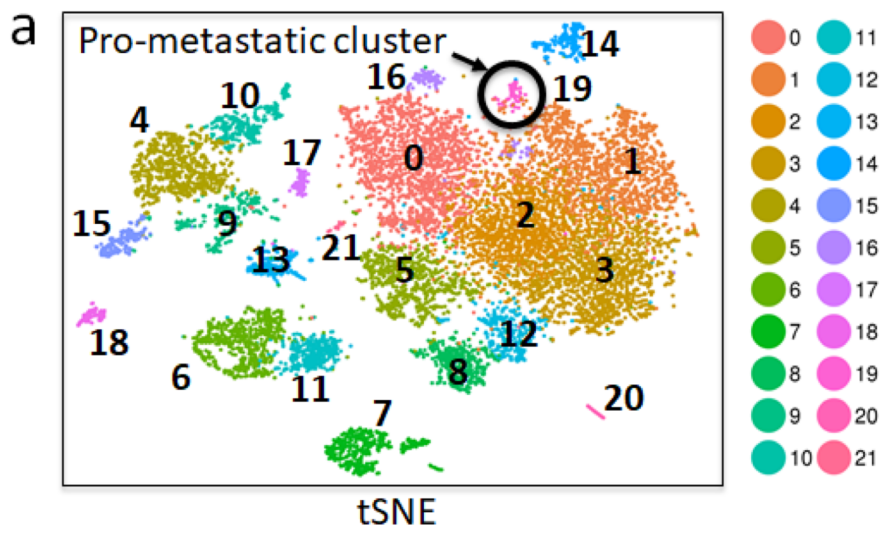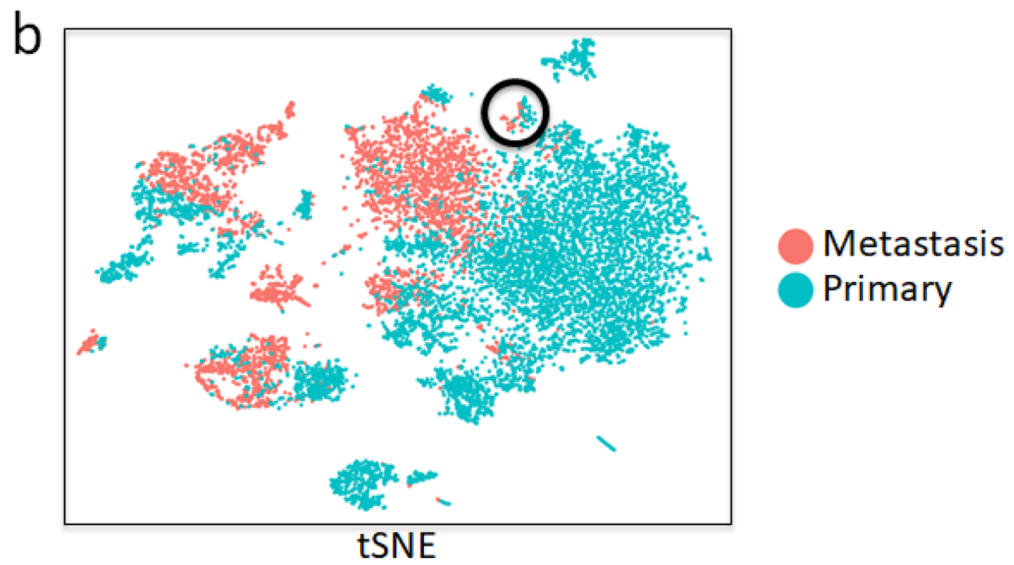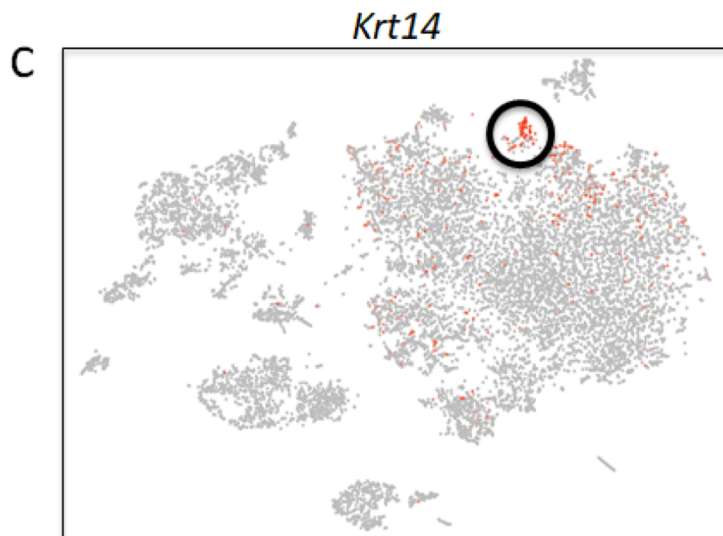

Supplementary Figure 6

**Supplementary Figure 6: a.** A combined tSNE plot of 7,791 primary breast tumor cells (N = 5) and 3,979 metastatic lung tumor cells (N = 3). Cluster 19 - the pro-metastatic cluster is circled. **b.** tSNE showing the cell of origin of the analysis in a. The circle shows that cluster 19 is made of both wild type (WT) primary breast cells in blue and metastatic lung (met) cells in salmon. **c.** Feature plot showing expression of *Krt14* on the tSNE localized in cluster 19.

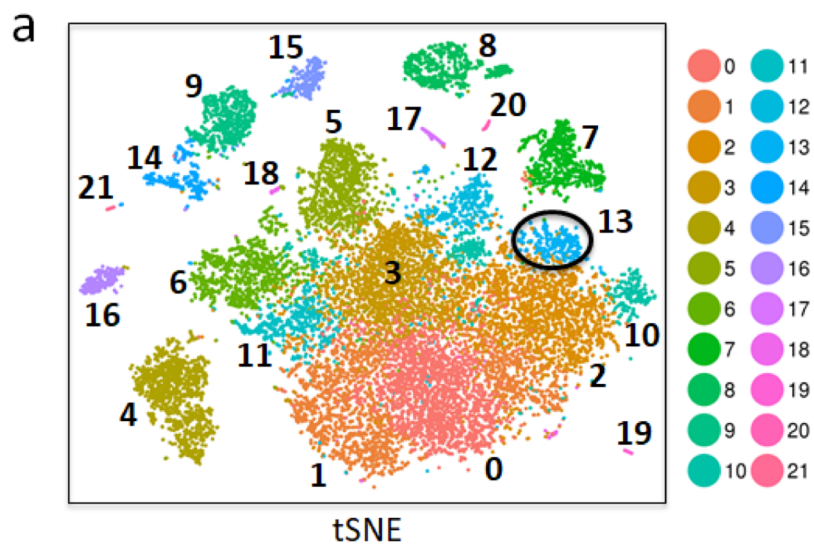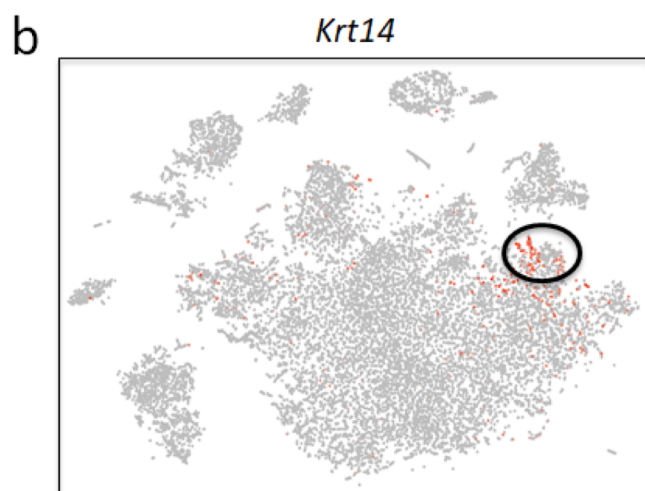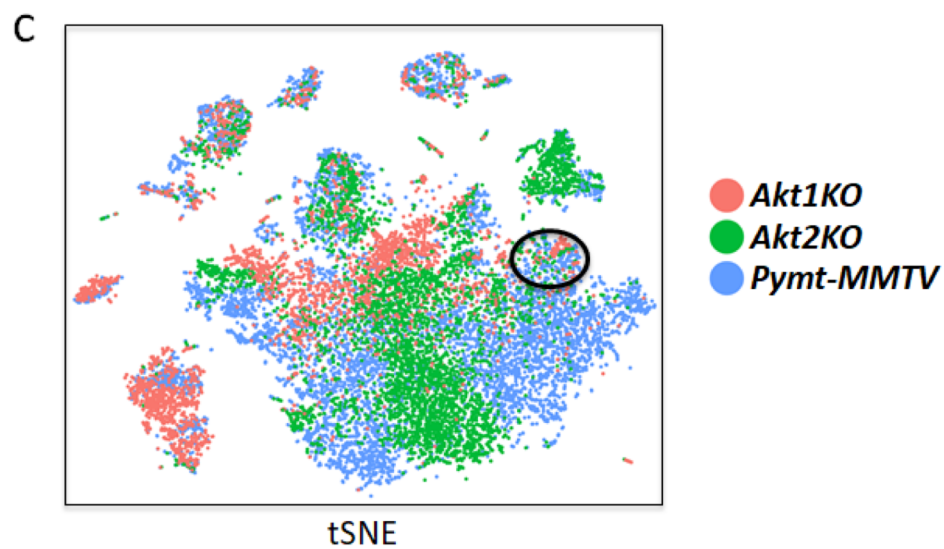

Supplementary Figure 7



**Supplementary Figure 7: a.** A combined tSNE plot of 7,791 primary breast tumor cells (N = 5), 3,194 cells of primary tumors following systemic *Akt1* deletion (N = 3), and 4,647 cells of primary tumors following systemic *Akt2* deletion (N = 3). Cluster 13 - the pro-metastatic population, is circled. **b.** Feature plot showing the expression of *Krt14* on the tSNE localized in cluster 13. **c.** tSNE showing the cell of origin of the analysis in a. The circle shows that cluster 13 consists of WT cells in blue, systemic *Akt1* deletion in salmon, and systemic *Akt2* deletion in green.

MMTV-PyMT;R26Cre<sup>ERT2</sup> + TAM

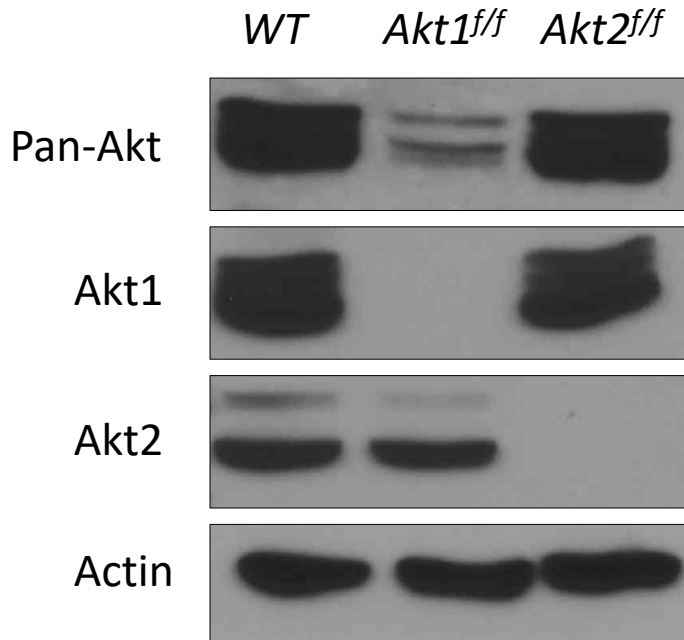

**Supplementary Figure 8:** Immunoblot showing total Akt expression (pan-Akt) in neutrophils isolated from either control (WT) or systemically deleted Akt1 or Akt2 tumor-bearing mice.
